# Supplementary material for: The carbon footprint and energy consumption of liver transplantation
Source: Front Transplant. 2025 Jan 6;3:1441928. doi: 10.3389/frtra.2024.1441928 (PMC11743657; doi:10.3389/frtra.2024.1441928)
Supplement: Supplementary file 2 [file Datasheet2.xlsx]

## Sheet: OVERALL 
Colonna1	Colonna2	Colonna3	Colonna4	Colonna5	Colonna6
		ITEM	kWh/mL/kg	functioning hours	measure
ENERGY
A	PURPOSE	OR1-Recipient surgery
1	environmental	Air conditioning/heating/ventilation OR 1	21	occupancy	from 1st nurse access to last nurse exit
2	environmental	Operating room 1 halogen area	0.4	occupancy	from 1st nurse access to last nurse exit
3	environmental	Led light bulb x 12 OR 1	0.144	occupancy	surgery duration
4	instrument	Electrosurgical unit	1.15	surgery	surgery duration
5	instrument	Argon beamer	1.15	surgery	surgery duration
6	equipment	Mattress heater	1.035	from patient prep to transfer	from patient entering OR to transfer
7	equipment	Extracorporeal pump machine	3	extracorporeal pump time	from start to finish
8	equipment	Electric stocking compressor	0.4	from patient prep to transfer	from patient entering OR to transfer
9	equipment	Operating bed space (ventilator, patient monitor with 2 screens, five syringe pumps, infusion pumps, humidifier)	0.236	from patient prep to transfer	from patient entering OR to transfer
10	equipment	Operation table	0.8	from patient prep to transfer	from patient entering OR to transfer
11	equipment	PC	0.1	occupancy	from 1st nurse access to last nurse exit
12	equipment	Ultrasound machine	0.7	usage	usage
13	equipment	Wall monitor	0.2	occupancy	from 1st nurse access to last nurse exit
14	equipment	Water heater	4	occupancy	surgery duration
15	equipment	Blood cell saver	0.23	surgery	surgery duration
16	equipment	ROTEM	0.15	surgery	from patient entering OR to transfer
17	equipment	Portable radiography	6	usage	usage
B	PURPOSE	OR2-back-table
18	environmental	Air conditioning/heating/ventilation OR 2	21	occupancy	from 1st nurse access to last nurse exit
19	environmental	Operating room 2 halogen area	0.4	occupancy	from 1st nurse access to last nurse exit
20	environmental	Led light bulb x 12 OR 2	0.144	occupancy	surgery duration
21	equipment	Machine perfusion	0.99	usage	perfusion duration from start to finish
22	equipment	PC	0.1	occupancy	from 1st nurse access to last nurse exit
C	PURPOSE	OR area
23	environmental	Operating rooms area halogen lighting	4	occupancy	from 1st nurse access to last nurse exit
24	environmental	Recovery room air conditioning	1.2	occupancy	from 1st nurse access to last nurse exit
25	environmental	Staff area air conditioning/heating	2	occupancy	from 1st nurse access to last nurse exit
26	environmental	OR area air conditioning/heating	4	occupancy	from 1st nurse access to last nurse exit
27	equipment	Fridge 1 (drugs)	0.4	daily	daily
28	equipment	Fridge 2 (blood, perfusion solutions)	0.4	daily	daily
29	equipment	Fridge 3 (ice maker)	0.4	daily	daily
30	equipment	Blood heater	1.15	surgery	surgery duration
31	equipment	Microwave	1.5	usage	usage
32	equipment	On-site steriliser for fast-track procedures	3	usage	usage
33	equipment	Blood gas analyzer	0.12	occupancy	from 1st nurse access to last nurse exit
34	equipment	PC (OR coordinator)	0.1	occupancy	from 1st nurse access to last nurse exit
D	PURPOSE	Coordinating nurse area
35	environmental	Nurse coordination office air conditioning/heating	2	occupancy	from 1st nurse access to last nurse exit
36	environmental	Nurse coordination office halogen lighting	0.8	occupancy	from 1st nurse access to last nurse exit
37	equipment	Nurse coordination office PC 1	0.1	occupancy	from 1st nurse access to last nurse exit
38	equipment	Nurse coordination office PC 2	0.1	occupancy	from 1st nurse access to last nurse exit
E	PURPOSE	Relaxation area
39	environmental	Halogen lighting	1.2	occupancy	from 1st nurse access to last nurse exit
40	equipment	PC	0.1	occupancy	from 1st nurse access to last nurse exit
F	PURPOSE	Common infrastructures
41	environmental	HEPA filter	4	occupancy	from 1st nurse access to last nurse exit
TOTAL ENERGY
CONVERSION FACTOR
ENERGY CO2e
VOLATILE ANESTHETICS
G		Volatile anesthetics
42	anesthesia	sevoflurane (mL)	NA	surgery	surgery
CONVERSION FACTOR
VA CO2e
SOLID WASTE
H	PURPOSE
43	infection control	Drapes, gowns and gloves
44	consumables	Blue pack items (i.e., basins, sponges, towels, suction tubing, etc…)
45	single-use devices	Single-use devices (e.g., skin staplers, disposable energy-based surgical instruments, etc…)
46	sterile wrap	Disposable blue wrap to maintain instrument tray sterility.
TOTAL WASTE
CF=A+B+C+D+E+F+G+H

## Sheet: Foglio1
Colonna1	Colonna2	Colonna3	Colonna4	Colonna5	Colonna6	Colonna7	Colonna8	Colonna9	Colonna10	Colonna11	Colonna12	Colonna13	Colonna14	Colonna15	Colonna16	Colonna17	Colonna18	Colonna19	Colonna20	Colonna21	Colonna22	Colonna23	Colonna24	Colonna25	Colonna26	Colonna27	Colonna28	Colonna29	Colonna30	Colonna31	Colonna32	Colonna33	Colonna34	Colonna35	Colonna36	Colonna37	Colonna38	Colonna39	Colonna40	Colonna41	Colonna42	Colonna43	Colonna44	Colonna45	Colonna46	Colonna47	Colonna48	Colonna49	Colonna50
patient	sex	age at tx	indication	duration of surgery	CIT	WIT	MP	MELD	donor age	donor sex	donor death CVA	HVAC	OR1 Halogen	LED bulb	Electrosurgical unit	Argon beamer	Mattress heater	EPM	Stocking	Bed space	Table	PC	US	Wall monitor	Water heater	Cell saver	ROTEM	Rx	HVAC	OR2 Halogen	LED bulb	MP	PC	Halogen lighting	Recovery room	Staff area ventilation	OR area ventilation	Fridge1	Fridge2	Fridge3	Blood heater	Microwave	Steriliser	Gas	PC	Nurse ventilation	Nurse halogen	Nurse PC1	Nurse PC2
1				6.7	9.3	88	0	11	89	M	1	182.7	3.48	0.938	7.705	7.705	8.968	9.3	4.68	2.088	6.96	0.87	0.35	1.74	34.8	1.541	1.305	3	182.7	3.48	0.938	0	0.87	27.6	10.44	17.4	34.8	9.6	9.6	9.6	7.705	0.75	6	1.305	0.87	17.4	6.96	0.87	1.13
2				6.1	8.4	92	0	14	84	F	1	170.1	3.24	0.854	7.015	7.015	8.344	9.3	4.44	1.944	6.48	0.81	0.35	1.62	32.4	0	1.215	3	170.1	3.24	0.854	0	0.81	27.6	9.72	16.2	32.4	9.6	9.6	9.6	7.015	0.75	6	1.215	0.81	16.2	6.48	0.81	1.04
8				8.1	9.3	96	0	12	77	M	1	212.1	4.04	1.134	9.315	9.315	10.424	9.3	5.24	2.424	8.08	1.01	0.35	2.02	40.4	0	1.515	3	182.7	4.04	1.134	0	1.01	25.2	12.12	20.2	40.4	9.6	9.6	9.6	9.315	0.75	6	1.515	1.01	20.2	8.08	1.01	1.13
6				7.2	8.5	85	0	13	76	F	1	193.2	3.68	1.008	8.28	8.28	9.488	9.3	4.88	2.208	7.36	0.92	0.35	1.84	36.8	0	1.38	3	170.1	3.68	1.008	0	0.92	33.2	11.04	18.4	36.8	9.6	9.6	9.6	8.28	0.75	6	1.38	0.92	18.4	7.36	0.92	1.05
7				4.5	10.2	94	0	16	76	M	0	136.5	2.6	0.63	5.175	5.175	6.68	9.3	3.8	1.56	5.2	0.65	0.35	1.3	26	0	0.975	3	212.1	2.6	0.63	0	0.65	29.6	7.8	13	26	9.6	9.6	9.6	5.175	0.75	6	0.975	0.65	13	5.2	0.65	1.22
3				9	8.2	102	0	17	70	M	1	231	4.4	1.26	10.35	10.35	11.36	9.3	5.6	2.64	8.8	1.1	0.35	2.2	44	0	1.65	3	193.2	4.4	1.26	0	1.1	18.8	13.2	22	44	9.6	9.6	9.6	10.35	0.75	6	1.65	1.1	22	8.8	1.1	1.02
4				6.7	9.9	78	0	8	66	M	1	182.7	3.48	0.938	7.705	7.705	8.968	9.3	4.68	2.088	6.96	0.87	0.35	1.74	34.8	0	1.305	3	136.5	3.48	0.938	0	0.87	36.8	10.44	17.4	34.8	9.6	9.6	9.6	7.705	0.75	6	1.305	0.87	17.4	6.96	0.87	1.19
5				6	9.5	84	0	7	58	M	1	168	3.2	0.84	6.9	6.9	8.24	9.3	4.4	1.92	6.4	0.8	0.35	1.6	32	0	1.2	3	231	3.2	0.84	0	0.8	27.6	9.6	16	32	9.6	9.6	9.6	6.9	0.75	6	1.2	0.8	16	6.4	0.8	1.15
12				6.6	8.4	76	0	15	88	F	1	180.6	3.44	0.924	7.59	7.59	8.864	9.2	4.64	2.064	6.88	0.86	0.35	1.72	34.4	0	1.29	3	182.7	3.44	0.924	0	0.86	24.8	10.32	17.2	34.4	9.6	9.6	9.6	7.59	0.75	6	1.29	0.86	17.2	6.88	0.86	1.04
9				6.2	6.8	99	0	6	78	M	1	172.2	3.28	0.868	7.13	7.13	8.448	9.2	4.48	1.968	6.56	0.82	0.35	1.64	32.8	1.43	1.23	3	168	3.28	0.868	0	0.82	27.2	9.84	16.4	32.8	9.6	9.6	9.6	7.13	0.75	6	1.23	0.82	16.4	6.56	0.82	0.88
10				6.8	9.5	103	0	12	78	M	1	184.8	3.52	0.952	7.82	7.82	9.072	9.2	4.72	2.112	7.04	0.88	0.35	1.76	35.2	0	1.32	3	180.6	3.52	0.952	0	0.88	25.6	10.56	17.6	35.2	9.6	9.6	9.6	7.82	0.75	6	1.32	0.88	17.6	7.04	0.88	1.15
11				4.8	9.9	110	0	15	78	M	1	142.8	2.72	0.672	5.52	5.52	6.992	9.2	3.92	1.632	5.44	0.68	0.35	1.36	27.2	0	1.02	3	172.2	2.72	0.672	0	0.68	28	8.16	13.6	27.2	9.6	9.6	9.6	5.52	0.75	6	1.02	0.68	13.6	5.44	0.68	1.19
15				6.3	8.6	91	0	17	78	M	1	174.3	3.32	0.882	7.245	7.245	8.552	9.2	4.52	1.992	6.64	0.83	0.35	1.66	33.2	0	1.245	3	184.8	3.32	0.882	0	0.83	20	9.96	16.6	33.2	9.6	9.6	9.6	7.245	0.75	6	1.245	0.83	16.6	6.64	0.83	1.06
13				5.8	10.1	78	0	15	75	M	0	163.8	3.12	0.812	6.67	6.67	8.032	9.2	4.32	1.872	6.24	0.78	0.35	1.56	31.2	0	1.17	3	142.8	3.12	0.812	0	0.78	26	9.36	15.6	31.2	9.6	9.6	9.6	6.67	0.75	6	1.17	0.78	15.6	6.24	0.78	1.21
17				6.7	9.6	94	0	15	74	M	0	182.7	3.48	0.938	7.705	7.705	8.968	9.2	4.68	2.088	6.96	0.87	0.35	1.74	34.8	0	1.305	3	174.3	3.48	0.938	0	0.87	24	10.44	17.4	34.8	9.6	9.6	9.6	7.705	0.75	6	1.305	0.87	17.4	6.96	0.87	1.16
16				5	10.3	93	0	8	69	M	0	147	2.8	0.7	5.75	5.75	7.2	9.2	4	1.68	5.6	0.7	0.35	1.4	28	0	1.05	3	163.8	2.8	0.7	0	0.7	27.6	8.4	14	28	9.6	9.6	9.6	5.75	0.75	6	1.05	0.7	14	5.6	0.7	1.23
14				8.3	7.8	80	0	10	54	M	1	216.3	4.12	1.162	9.545	9.545	10.632	9.2	5.32	2.472	8.24	1.03	0.35	2.06	41.2	0	1.545	3	182.7	4.12	1.162	0	1.03	20.8	12.36	20.6	41.2	9.6	9.6	9.6	9.545	0.75	6	1.545	1.03	20.6	8.24	1.03	0.98
18				5.1	8.6	97	0	11	70	M	1	149.1	2.84	0.714	5.865	5.865	7.304	9.1	4.04	1.704	5.68	0.71	0.35	1.42	28.4	0	1.065	3	147	2.84	0.714	0	0.71	34	8.52	14.2	28.4	9.6	9.6	9.6	5.865	0.75	6	1.065	0.71	14.2	5.68	0.71	1.06
21				7.8	9.6	75	1	12	89	M	1	205.8	3.92	1.092	8.97	8.97	10.112	9	5.12	2.352	7.84	0.98	0.35	1.96	39.2	0	1.47	3	216.3	3.92	1.092	5.742	0.98	21.2	11.76	19.6	39.2	9.6	9.6	9.6	8.97	0.75	6	1.47	0.98	19.6	7.84	0.98	1.16
22				5.2	9.5	87	0	8	76	F	1	151.2	2.88	0.728	5.98	5.98	7.408	9	4.08	1.728	5.76	0.72	0.35	1.44	28.8	0	1.08	3	149.1	2.88	0.728	0	0.72	32	8.64	14.4	28.8	9.6	9.6	9.6	5.98	0.75	6	1.08	0.72	14.4	5.76	0.72	1.15
19				6.2	8.4	100	0	17	73	M	0	172.2	3.28	0.868	7.13	7.13	8.448	9	4.48	1.968	6.56	0.82	0.35	1.64	32.8	1.426	1.23	3	179.76	3.28	0.868	0	0.82	25.6	9.84	16.4	32.8	9.6	9.6	9.6	7.13	0.75	6	1.23	0.82	16.4	6.56	0.82	0.9
20				10.2	8.2	110	0	22	70	M	1	256.2	4.88	1.428	11.73	11.73	12.608	9	6.08	2.928	9.76	1.22	0.35	2.44	48.8	0	1.83	3	151.2	4.88	1.428	0	1.22	25.6	14.64	24.4	48.8	9.6	9.6	9.6	11.73	0.75	6	1.83	1.22	24.4	9.76	1.22	1.02
23				6.7	8.5	88	0	20	66	M	0	182.7	3.48	0.938	7.705	7.705	8.968	9	4.68	2.088	6.96	0.87	0.35	1.74	34.8	0	1.305	3	172.2	3.48	0.938	0	0.87	41.6	10.44	17.4	34.8	9.6	9.6	9.6	7.705	0.75	6	1.305	0.87	17.4	6.96	0.87	1.05
25				9	9.2	96	0	21	54	M	1	231	4.4	1.26	10.35	10.35	11.36	9	5.6	2.64	8.8	1.1	0.35	2.2	44	0	1.65	3	256.2	4.4	1.26	0	1.1	27.6	13.2	22	44	9.6	9.6	9.6	10.35	0.75	6	1.65	1.1	22	8.8	1.1	1.12
24				6.1	10.2	89	0	6	21	M	1	170.1	3.24	0.854	7.015	7.015	8.344	9	4.44	1.944	6.48	0.81	0.35	1.62	32.4	0	1.215	3	182.7	3.24	0.854	0	0.81	36.8	9.72	16.2	32.4	9.6	9.6	9.6	7.015	0.75	6	1.215	0.81	16.2	6.48	0.81	1.22
26				6.4	8.8	76	0	18	21	M	1	176.4	3.36	0.896	7.36	7.36	8.656	9	4.56	2.016	6.72	0.84	0.35	1.68	33.6	0	1.26	3	231	3.36	0.896	0	0.84	25.2	10.08	16.8	33.6	9.6	9.6	9.6	7.36	0.75	6	1.26	0.84	16.8	6.72	0.84	1.08
32				5.4	9.5	88	0	15	89	M	1	155.4	2.96	0.756	6.21	6.21	7.616	8.9	4.16	1.776	5.92	0.74	0.35	1.48	29.6	0	1.11	3	170.1	2.96	0.756	0	0.74	26.4	8.88	14.8	29.6	9.6	9.6	9.6	6.21	0.75	6	1.11	0.74	14.8	5.92	0.74	1.15
31				5.5	9.9	87	0	19	77	M	1	157.5	3	0.77	6.325	6.325	7.72	8.9	4.2	1.8	6	0.75	0.35	1.5	30	0	1.125	3	176.4	3	0.77	0	0.75	22.4	9	15	30	9.6	9.6	9.6	6.325	0.75	6	1.125	0.75	15	6	0.75	1.19
34				9.2	10.2	102	0	21	77	F	1	235.2	4.48	1.288	10.58	10.58	11.568	8.9	5.68	2.688	8.96	1.12	0.35	2.24	44.8	0	1.68	3	155.4	4.48	1.288	0	1.12	22.8	13.44	22.4	44.8	9.6	9.6	9.6	10.58	0.75	6	1.68	1.12	22.4	8.96	1.12	1.22
33				6.4	8.5	92	0	11	75	M	0	176.4	3.36	0.896	7.36	7.36	8.656	8.9	4.56	2.016	6.72	0.84	0.35	1.68	33.6	0	1.26	3	157.5	3.36	0.896	0	0.84	37.6	10.08	16.8	33.6	9.6	9.6	9.6	7.36	0.75	6	1.26	0.84	16.8	6.72	0.84	1.05
30				5.4	8.3	93	0	14	74	M	1	155.4	2.96	0.756	6.21	6.21	7.616	8.9	4.16	1.776	5.92	0.74	0.35	1.48	29.6	0	1.11	3	235.2	2.96	0.756	0	0.74	26.4	8.88	14.8	29.6	9.6	9.6	9.6	6.21	0.75	6	1.11	0.74	14.8	5.92	0.74	1.03
27				6	7.8	89	0	12	73	M	0	168	3.2	0.84	6.9	6.9	8.24	8.9	4.4	1.92	6.4	0.8	0.35	1.6	32	0	1.2	3	176.4	3.2	0.84	0	0.8	22.4	9.6	16	32	9.6	9.6	9.6	6.9	0.75	6	1.2	0.8	16	6.4	0.8	0.98
28				7.2	9.3	112	0	13	66	M	1	193.2	3.68	1.008	8.28	8.28	9.488	8.9	4.88	2.208	7.36	0.92	0.35	1.84	36.8	0	1.38	3	155.4	3.68	1.008	0	0.92	24.8	11.04	18.4	36.8	9.6	9.6	9.6	8.28	0.75	6	1.38	0.92	18.4	7.36	0.92	1.13
29				4.5	8.4	104	0	16	58	M	1	136.5	2.6	0.63	5.175	5.175	6.68	8.9	3.8	1.56	5.2	0.65	0.35	1.3	26	0	0.975	3	168	2.6	0.63	0	0.65	29.6	7.8	13	26	9.6	9.6	9.6	5.175	0.75	6	0.975	0.65	13	5.2	0.65	1.04
35				7.2	9.4	78	1	17	89	M	1	193.2	3.68	1.008	8.28	8.28	9.488	8.4	4.88	2.208	7.36	0.92	0.35	1.84	36.8	0	1.38	3	196.56	3.68	1.008	5.742	0.92	18.8	11.04	18.4	36.8	9.6	9.6	9.6	8.28	0.75	6	1.38	0.92	18.4	7.36	0.92	1.1
39				5.4	8.6	96	0	8	89	M	1	155.4	2.96	0.756	6.21	6.21	7.616	8.4	4.16	1.776	5.92	0.74	0.35	1.48	29.6	0	1.11	3	136.5	2.96	0.756	0	0.74	29.6	8.88	14.8	29.6	9.6	9.6	9.6	6.21	0.75	6	1.11	0.74	14.8	5.92	0.74	1.06
40				6.4	10.3	99	0	7	84	F	1	176.4	3.36	0.896	7.36	7.36	8.656	8.4	4.56	2.016	6.72	0.84	0.35	1.68	33.6	0	1.26	3	193.2	3.36	0.896	0	0.84	22.4	10.08	16.8	33.6	9.6	9.6	9.6	7.36	0.75	6	1.26	0.84	16.8	6.72	0.84	1.23
38				5.5	7.8	94	0	15	78	M	1	157.5	3	0.77	6.325	6.325	7.72	8.4	4.2	1.8	6	0.75	0.35	1.5	30	0	1.125	3	155.4	3	0.77	0	0.75	26.4	9	15	30	9.6	9.6	9.6	6.325	0.75	6	1.125	0.75	15	6	0.75	0.98
36				4.5	8.3	84	1	6	77	F	1	136.5	2.6	0.63	5.175	5.175	6.68	8.4	3.8	1.56	5.2	0.65	0.35	1.3	26	1.035	0.975	3	176.4	2.6	0.63	6.138	0.65	22.8	7.8	13	26	9.6	9.6	9.6	5.175	0.75	6	0.975	0.65	13	5.2	0.65	1.03
37				8.1	9.9	85	0	12	70	F	1	212.1	4.04	1.134	9.315	9.315	10.424	8.4	5.24	2.424	8.08	1.01	0.35	2.02	40.4	0	1.515	3	157.5	4.04	1.134	0	1.01	18.8	12.12	20.2	40.4	9.6	9.6	9.6	9.315	0.75	6	1.515	1.01	20.2	8.08	1.01	1.19
42				6.7	9.2	110	0	15	68	F	0	182.7	3.48	0.938	7.705	7.705	8.968	8.4	4.68	2.088	6.96	0.87	0.35	1.74	34.8	0	1.305	3	136.5	3.48	0.938	0	0.87	33.2	10.44	17.4	34.8	9.6	9.6	9.6	7.705	0.75	6	1.305	0.87	17.4	6.96	0.87	1.12
43				4.5	8.4	76	0	17	67	M	1	136.5	2.6	0.63	5.175	5.175	6.68	8.4	3.8	1.56	5.2	0.65	0.35	1.3	26	0	0.975	3	212.1	2.6	0.63	0	0.65	27.6	7.8	13	26	9.6	9.6	9.6	5.175	0.75	6	0.975	0.65	13	5.2	0.65	1.04
41				9.2	9.2	103	0	15	23	F	1	235.2	4.48	1.288	10.58	10.58	11.568	8.4	5.68	2.688	8.96	1.12	0.35	2.24	44.8	2.116	1.68	3	182.7	4.48	1.288	0	1.12	18.8	13.44	22.4	44.8	9.6	9.6	9.6	10.58	0.75	6	1.68	1.12	22.4	8.96	1.12	1.12
46				10.2	9.4	91	0	15	93	F	1	256.2	4.88	1.428	11.73	11.73	12.608	6.6	6.08	2.928	9.76	1.22	0.35	2.44	48.8	2.346	1.83	3	256.2	4.88	1.428	0	1.22	37.6	14.64	24.4	48.8	9.6	9.6	9.6	11.73	0.75	6	1.83	1.22	24.4	9.76	1.22	1.14
49				6.7	9.2	97	0	8	89	M	1	182.7	3.48	0.938	7.705	7.705	8.968	6.6	4.68	2.088	6.96	0.87	0.35	1.74	34.8	0	1.305	3	235.2	3.48	0.938	0	0.87	41.6	10.44	17.4	34.8	9.6	9.6	9.6	7.705	0.75	6	1.305	0.87	17.4	6.96	0.87	1.12
50				6.1	8.4	100	0	10	76	F	1	170.1	3.24	0.854	7.015	7.015	8.344	6.6	4.44	1.944	6.48	0.81	0.35	1.62	32.4	0	1.215	3	256.2	3.24	0.854	0	0.81	27.6	9.72	16.2	32.4	9.6	9.6	9.6	7.015	0.75	6	1.215	0.81	16.2	6.48	0.81	1.04
44				5.4	10.3	78	0	11	73	M	0	155.4	2.96	0.756	6.21	6.21	7.616	6.6	4.16	1.776	5.92	0.74	0.35	1.48	29.6	0	1.11	3	182.7	2.96	0.756	0	0.74	25.2	8.88	14.8	29.6	9.6	9.6	9.6	6.21	0.75	6	1.11	0.74	14.8	5.92	0.74	1.23
51				9	10.1	111	0	12	68	F	0	231	4.4	1.26	10.35	10.35	11.36	6.6	5.6	2.64	8.8	1.1	0.35	2.2	44	0	1.65	3	170.1	4.4	1.26	0	1.1	22.4	13.2	22	44	9.6	9.6	9.6	10.35	0.75	6	1.65	1.1	22	8.8	1.1	1.21
47				8.1	8.2	93	0	8	54	M	1	212.1	4.04	1.134	9.315	9.315	10.424	6.6	5.24	2.424	8.08	1.01	0.35	2.02	40.4	1.863	1.515	3	155.4	4.04	1.134	0	1.01	36.8	12.12	20.2	40.4	9.6	9.6	9.6	9.315	0.75	6	1.515	1.01	20.2	8.08	1.01	1.02
48				5.2	9.6	94	0	17	32	F	1	151.2	2.88	0.728	5.98	5.98	7.408	6.6	4.08	1.728	5.76	0.72	0.35	1.44	28.8	0	1.08	3	231	2.88	0.728	0	0.72	33.2	8.64	14.4	28.8	9.6	9.6	9.6	5.98	0.75	6	1.08	0.72	14.4	5.76	0.72	1.16
45				6.2	9.2	80	0	22	23	F	1	172.2	3.28	0.868	7.13	7.13	8.448	6.6	4.48	1.968	6.56	0.82	0.35	1.64	32.8	0	1.23	3	212.1	3.28	0.868	0	0.82	21.6	9.84	16.4	32.8	9.6	9.6	9.6	7.13	0.75	6	1.23	0.82	16.4	6.56	0.82	1.12
59				7	8.4	97	0	20	77	M	1	189	3.6	0.98	8.05	8.05	9.28	6.5	4.8	2.16	7.2	0.9	0.35	1.8	36	0	1.35	3	151.2	3.6	0.98	0	0.9	25.6	10.8	18	36	9.6	9.6	9.6	8.05	0.75	6	1.35	0.9	18	7.2	0.9	1.04
52				6.8	9.2	75	0	21	75	M	1	184.8	3.52	0.952	7.82	7.82	9.072	6.5	4.72	2.112	7.04	0.88	0.35	1.76	35.2	0	1.32	3	172.2	3.52	0.952	0	0.88	28.8	10.56	17.6	35.2	9.6	9.6	9.6	7.82	0.75	6	1.32	0.88	17.6	7.04	0.88	1.12
55				5.8	9.2	89	0	6	74	M	0	163.8	3.12	0.812	6.67	6.67	8.032	6.5	4.32	1.872	6.24	0.78	0.35	1.56	31.2	0	1.17	3	189	3.12	0.812	0	0.78	28	9.36	15.6	31.2	9.6	9.6	9.6	6.67	0.75	6	1.17	0.78	15.6	6.24	0.78	1.12
57				6.3	7.2	76	0	18	72	M	1	174.3	3.32	0.882	7.245	7.245	8.552	6.5	4.52	1.992	6.64	0.83	0.35	1.66	33.2	0	1.245	3	184.8	3.32	0.882	0	0.83	24	9.96	16.6	33.2	9.6	9.6	9.6	7.245	0.75	6	1.245	0.83	16.6	6.64	0.83	0.92
56				8.3	8.8	96	0	15	66	M	1	216.3	4.12	1.162	9.545	9.545	10.632	6.5	5.32	2.472	8.24	1.03	0.35	2.06	41.2	0	1.545	3	163.8	4.12	1.162	0	1.03	26	12.36	20.6	41.2	9.6	9.6	9.6	9.545	0.75	6	1.545	1.03	20.6	8.24	1.03	1.08
53				4.8	8.4	87	0	19	61	F	1	142.8	2.72	0.672	5.52	5.52	6.992	6.5	3.92	1.632	5.44	0.68	0.35	1.36	27.2	0	1.02	3	174.3	2.72	0.672	0	0.68	34	8.16	13.6	27.2	9.6	9.6	9.6	5.52	0.75	6	1.02	0.68	13.6	5.44	0.68	1.04
54				5.4	10.1	88	0	21	61	F	1	155.4	2.96	0.756	6.21	6.21	7.616	6.5	4.16	1.776	5.92	0.74	0.35	1.48	29.6	1.242	1.11	3	216.3	2.96	0.756	0	0.74	20	8.88	14.8	29.6	9.6	9.6	9.6	6.21	0.75	6	1.11	0.74	14.8	5.92	0.74	1.21
58				5	9.3	89	0	11	21	M	1	147	2.8	0.7	5.75	5.75	7.2	6.5	4	1.68	5.6	0.7	0.35	1.4	28	0	1.05	3	142.8	2.8	0.7	0	0.7	22.4	8.4	14	28	9.6	9.6	9.6	5.75	0.75	6	1.05	0.7	14	5.6	0.7	1.13
61				6.4	9.4	93	0	14	89	M	1	176.4	3.36	0.896	7.36	7.36	8.656	6.4	4.56	2.016	6.72	0.84	0.35	1.68	33.6	0	1.26	3	155.4	3.36	0.896	0	0.84	20.8	10.08	16.8	33.6	9.6	9.6	9.6	7.36	0.75	6	1.26	0.84	16.8	6.72	0.84	1.14
67				5.4	9.2	84	0	12	78	M	1	155.4	2.96	0.756	6.21	6.21	7.616	6.4	4.16	1.776	5.92	0.74	0.35	1.48	29.6	0	1.11	3	147	2.96	0.756	0	0.74	26.4	8.88	14.8	29.6	9.6	9.6	9.6	6.21	0.75	6	1.11	0.74	14.8	5.92	0.74	1.12
60				5.4	9.5	104	0	13	73	M	0	155.4	2.96	0.756	6.21	6.21	7.616	6.4	4.16	1.776	5.92	0.74	0.35	1.48	29.6	0	1.11	3	176.4	2.96	0.756	0	0.74	22.4	8.88	14.8	29.6	9.6	9.6	9.6	6.21	0.75	6	1.11	0.74	14.8	5.92	0.74	1.15
64				6.2	7.8	92	0	16	72	M	1	172.2	3.28	0.868	7.13	7.13	8.448	6.4	4.48	1.968	6.56	0.82	0.35	1.64	32.8	0	1.23	3	155.4	3.28	0.868	0	0.82	22.4	9.84	16.4	32.8	9.6	9.6	9.6	7.13	0.75	6	1.23	0.82	16.4	6.56	0.82	0.98
63				7	10.1	88	0	17	70	M	1	189	3.6	0.98	8.05	8.05	9.28	6.4	4.8	2.16	7.2	0.9	0.35	1.8	36	0	1.35	3	155.4	3.6	0.98	0	0.9	25.6	10.8	18	36	9.6	9.6	9.6	8.05	0.75	6	1.35	0.9	18	7.2	0.9	1.21
66				4.8	10.3	78	0	8	70	M	1	142.8	2.72	0.672	5.52	5.52	6.992	6.4	3.92	1.632	5.44	0.68	0.35	1.36	27.2	0	1.02	3	172.2	2.72	0.672	0	0.68	28.8	8.16	13.6	27.2	9.6	9.6	9.6	5.52	0.75	6	1.02	0.68	13.6	5.44	0.68	1.23
62				9.2	8.3	87	0	7	61	F	1	235.2	4.48	1.288	10.58	10.58	11.568	6.4	5.68	2.688	8.96	1.12	0.35	2.24	44.8	0	1.68	3	189	4.48	1.288	0	1.12	20	13.44	22.4	44.8	9.6	9.6	9.6	10.58	0.75	6	1.68	1.12	22.4	8.96	1.12	1.03
65				6.8	8.6	102	0	15	58	M	1	184.8	3.52	0.952	7.82	7.82	9.072	6.4	4.72	2.112	7.04	0.88	0.35	1.76	35.2	0	1.32	3	142.8	3.52	0.952	0	0.88	37.6	10.56	17.6	35.2	9.6	9.6	9.6	7.82	0.75	6	1.32	0.88	17.6	7.04	0.88	1.06
75				6.2	9.3	78	0	6	88	F	1	172.2	3.28	0.868	7.13	7.13	8.448	5.8	4.48	1.968	6.56	0.82	0.35	1.64	32.8	0	1.23	3	235.2	3.28	0.868	0	0.82	28	9.84	16.4	32.8	9.6	9.6	9.6	7.13	0.75	6	1.23	0.82	16.4	6.56	0.82	1.13
70				6.6	10.2	96	0	12	84	F	1	180.6	3.44	0.924	7.59	7.59	8.864	5.8	4.64	2.064	6.88	0.86	0.35	1.72	34.4	1.518	1.29	3	184.8	3.44	0.924	0	0.86	25.6	10.32	17.2	34.4	9.6	9.6	9.6	7.59	0.75	6	1.29	0.86	17.2	6.88	0.86	1.22
74				5.4	9.5	76	0	15	78	M	1	155.4	2.96	0.756	6.21	6.21	7.616	5.8	4.16	1.776	5.92	0.74	0.35	1.48	29.6	0	1.11	3	172.2	2.96	0.756	0	0.74	27.2	8.88	14.8	29.6	9.6	9.6	9.6	6.21	0.75	6	1.11	0.74	14.8	5.92	0.74	1.15
68				7.8	9.5	85	0	17	76	F	1	205.8	3.92	1.092	8.97	8.97	10.112	5.8	5.12	2.352	7.84	0.98	0.35	1.96	39.2	0	1.47	3	180.6	3.92	1.092	0	0.98	22.4	11.76	19.6	39.2	9.6	9.6	9.6	8.97	0.75	6	1.47	0.98	19.6	7.84	0.98	1.15
72				9	9.2	104	0	15	73	M	1	231	4.4	1.26	10.35	10.35	11.36	5.8	5.6	2.64	8.8	1.1	0.35	2.2	44	0	1.65	3	155.4	4.4	1.26	0	1.1	32	13.2	22	44	9.6	9.6	9.6	10.35	0.75	6	1.65	1.1	22	8.8	1.1	1.12
73				6.4	6.8	98	0	15	68	F	1	176.4	3.36	0.896	7.36	7.36	8.656	5.8	4.56	2.016	6.72	0.84	0.35	1.68	33.6	0	1.26	3	205.8	3.36	0.896	0	0.84	36.8	10.08	16.8	33.6	9.6	9.6	9.6	7.36	0.75	6	1.26	0.84	16.8	6.72	0.84	0.88
69				5.1	8.5	94	0	8	66	M	0	149.1	2.84	0.714	5.865	5.865	7.304	5.8	4.04	1.704	5.68	0.71	0.35	1.42	28.4	0	1.065	3	231	2.84	0.714	0	0.71	26.4	8.52	14.2	28.4	9.6	9.6	9.6	5.865	0.75	6	1.065	0.71	14.2	5.68	0.71	1.05
71				6.1	9.2	99	0	10	66	M	0	170.1	3.24	0.854	7.015	7.015	8.344	5.8	4.44	1.944	6.48	0.81	0.35	1.62	32.4	0	1.215	3	176.4	3.24	0.854	0	0.81	21.2	9.72	16.2	32.4	9.6	9.6	9.6	7.015	0.75	6	1.215	0.81	16.2	6.48	0.81	1.12
77				5.4	8.8	91	0	11	89	M	1	155.4	2.96	0.756	6.21	6.21	7.616	0	4.16	1.776	5.92	0.74	0.35	1.48	29.6	0	1.11	3	149.1	2.96	0.756	0	0.74	25.2	8.88	14.8	29.6	9.6	9.6	9.6	6.21	0.75	6	1.11	0.74	14.8	5.92	0.74	1.08
79				8.3	9.6	94	0	12	88	F	1	216.3	4.12	1.162	9.545	9.545	10.632	0	5.32	2.472	8.24	1.03	0.35	2.06	41.2	0	1.545	3	170.1	4.12	1.162	0	1.03	22.4	12.36	20.6	41.2	9.6	9.6	9.6	9.545	0.75	6	1.545	1.03	20.6	8.24	1.03	1.16
83				5.2	8.6	75	0	8	88	F	1	151.2	2.88	0.728	5.98	5.98	7.408	0	4.08	1.728	5.76	0.72	0.35	1.44	28.8	0	1.08	3	155.4	2.88	0.728	0	0.72	34	8.64	14.4	28.8	9.6	9.6	9.6	5.98	0.75	6	1.08	0.72	14.4	5.76	0.72	1.06
85				5.8	9.4	88	0	17	88	F	1	163.8	3.12	0.812	6.67	6.67	8.032	0	4.32	1.872	6.24	0.78	0.35	1.56	31.2	0	1.17	3	216.3	3.12	0.812	0	0.78	21.6	9.36	15.6	31.2	9.6	9.6	9.6	6.67	0.75	6	1.17	0.78	15.6	6.24	0.78	1.14
135				6.2	8.2	101	0	22	84	F	1	172.2	3.28	0.868	7.13	7.13	8.448	0	4.48	1.968	6.56	0.82	0.35	1.64	32.8	0	1.23	3	151.2	3.28	0.868	0	0.82	24	9.84	16.4	32.8	9.6	9.6	9.6	7.13	0.75	6	1.23	0.82	16.4	6.56	0.82	1.02
88				6.7	7.8	76	0	20	83	M	1	182.7	3.48	0.938	7.705	7.705	8.968	0	4.68	2.088	6.96	0.87	0.35	1.74	34.8	0	1.305	3	163.8	3.48	0.938	0	0.87	25.6	10.44	17.4	34.8	9.6	9.6	9.6	7.705	0.75	6	1.305	0.87	17.4	6.96	0.87	0.98
112				6.7	8.2	91	0	21	83	M	1	182.7	3.48	0.938	7.705	7.705	8.968	0	4.68	2.088	6.96	0.87	0.35	1.74	34.8	0	1.305	3	172.2	3.48	0.938	0	0.87	27.6	10.44	17.4	34.8	9.6	9.6	9.6	7.705	0.75	6	1.305	0.87	17.4	6.96	0.87	1.02
103				6.8	7.8	103	0	6	78	F	0	184.8	3.52	0.952	7.82	7.82	9.072	0	4.72	2.112	7.04	0.88	0.35	1.76	35.2	0	1.32	3	182.7	3.52	0.952	0	0.88	27.6	10.56	17.6	35.2	9.6	9.6	9.6	7.82	0.75	6	1.32	0.88	17.6	7.04	0.88	0.98
116				8.1	9.4	88	0	18	78	F	0	212.1	4.04	1.134	9.315	9.315	10.424	0	5.24	2.424	8.08	1.01	0.35	2.02	40.4	0	1.515	3	182.7	4.04	1.134	0	1.01	28	12.12	20.2	40.4	9.6	9.6	9.6	9.315	0.75	6	1.515	1.01	20.2	8.08	1.01	1.14
146				7.4	10.1	87	0	15	78	M	1	197.4	3.76	1.036	8.51	8.51	9.696	0	4.96	2.256	7.52	0.94	0.35	1.88	37.6	0	1.41	3	184.8	3.76	1.036	0	0.94	33.2	11.28	18.8	37.6	9.6	9.6	9.6	8.51	0.75	6	1.41	0.94	18.8	7.52	0.94	1.21
84				5.5	8.8	87	1	19	77	F	1	157.5	3	0.77	6.325	6.325	7.72	0	4.2	1.8	6	0.75	0.35	1.5	30	0	1.125	3	212.1	3	0.77	6.039	0.75	30.4	9	15	30	9.6	9.6	9.6	6.325	0.75	6	1.125	0.75	15	6	0.75	1.08
95				6	8.6	92	0	21	77	F	1	168	3.2	0.84	6.9	6.9	8.24	0	4.4	1.92	6.4	0.8	0.35	1.6	32	0	1.2	3	197.4	3.2	0.84	0	0.8	22.8	9.6	16	32	9.6	9.6	9.6	6.9	0.75	6	1.2	0.8	16	6.4	0.8	1.06
104				7.8	6.8	90	0	11	77	M	1	205.8	3.92	1.092	8.97	8.97	10.112	0	5.12	2.352	7.84	0.98	0.35	1.96	39.2	0	1.47	3	157.5	3.92	1.092	0	0.98	24.8	11.76	19.6	39.2	9.6	9.6	9.6	8.97	0.75	6	1.47	0.98	19.6	7.84	0.98	0.88
106				5	9	78	0	14	77	F	1	147	2.8	0.7	5.75	5.75	7.2	0	4	1.68	5.6	0.7	0.35	1.4	28	0	1.05	3	168	2.8	0.7	0	0.7	32	8.4	14	28	9.6	9.6	9.6	5.75	0.75	6	1.05	0.7	14	5.6	0.7	1.1
128				7.8	7.8	78	0	12	77	F	1	205.8	3.92	1.092	8.97	8.97	10.112	0	5.12	2.352	7.84	0.98	0.35	1.96	39.2	0	1.47	3	205.8	3.92	1.092	0	0.98	20.8	11.76	19.6	39.2	9.6	9.6	9.6	8.97	0.75	6	1.47	0.98	19.6	7.84	0.98	0.98
90				6.7	10.3	102	0	13	76	M	0	182.7	3.48	0.938	7.705	7.705	8.968	0	4.68	2.088	6.96	0.87	0.35	1.74	34.8	0	1.305	3	147	3.48	0.938	0	0.87	32	10.44	17.4	34.8	9.6	9.6	9.6	7.705	0.75	6	1.305	0.87	17.4	6.96	0.87	1.23
98				6.4	9.3	84	0	16	76	M	0	176.4	3.36	0.896	7.36	7.36	8.656	0	4.56	2.016	6.72	0.84	0.35	1.68	33.6	0	1.26	3	205.8	3.36	0.896	0	0.84	27.6	10.08	16.8	33.6	9.6	9.6	9.6	7.36	0.75	6	1.26	0.84	16.8	6.72	0.84	1.13
130				6.7	9.5	85	0	17	76	F	1	182.7	3.48	0.938	7.705	7.705	8.968	0	4.68	2.088	6.96	0.87	0.35	1.74	34.8	0	1.305	3	182.7	3.48	0.938	0	0.87	26.4	10.44	17.4	34.8	9.6	9.6	9.6	7.705	0.75	6	1.305	0.87	17.4	6.96	0.87	1.15
132				8.3	9.9	96	0	8	76	M	0	216.3	4.12	1.162	9.545	9.545	10.632	0	5.32	2.472	8.24	1.03	0.35	2.06	41.2	0	1.545	3	176.4	4.12	1.162	0	1.03	27.6	12.36	20.6	41.2	9.6	9.6	9.6	9.545	0.75	6	1.545	1.03	20.6	8.24	1.03	1.19
141				6.1	8.2	94	0	7	76	M	0	170.1	3.24	0.854	7.015	7.015	8.344	0	4.44	1.944	6.48	0.81	0.35	1.62	32.4	0	1.215	3	182.7	3.24	0.854	0	0.81	34	9.72	16.2	32.4	9.6	9.6	9.6	7.015	0.75	6	1.215	0.81	16.2	6.48	0.81	1.02
107				5.4	9.2	80	0	15	75	M	0	155.4	2.96	0.756	6.21	6.21	7.616	0	4.16	1.776	5.92	0.74	0.35	1.48	29.6	0	1.11	3	216.3	2.96	0.756	0	0.74	25.2	8.88	14.8	29.6	9.6	9.6	9.6	6.21	0.75	6	1.11	0.74	14.8	5.92	0.74	1.12
125				5.8	8.3	88	0	6	75	M	0	163.8	3.12	0.812	6.67	6.67	8.032	0	4.32	1.872	6.24	0.78	0.35	1.56	31.2	0	1.17	3	170.1	3.12	0.812	0	0.78	22.4	9.36	15.6	31.2	9.6	9.6	9.6	6.67	0.75	6	1.17	0.78	15.6	6.24	0.78	1.03
143				6.3	9.4	99	0	12	75	M	0	174.3	3.32	0.882	7.245	7.245	8.552	0	4.52	1.992	6.64	0.83	0.35	1.66	33.2	0	1.245	3	155.4	3.32	0.882	0	0.83	24	9.96	16.6	33.2	9.6	9.6	9.6	7.245	0.75	6	1.245	0.83	16.6	6.64	0.83	1.14
145				7	10.2	75	0	15	75	M	0	189	3.6	0.98	8.05	8.05	9.28	0	4.8	2.16	7.2	0.9	0.35	1.8	36	0	1.35	3	163.8	3.6	0.98	0	0.9	26	10.8	18	36	9.6	9.6	9.6	8.05	0.75	6	1.35	0.9	18	7.2	0.9	1.22
117				5.4	8.4	89	0	17	74	M	0	155.4	2.96	0.756	6.21	6.21	7.616	0	4.16	1.776	5.92	0.74	0.35	1.48	29.6	0	1.11	3	174.3	2.96	0.756	0	0.74	28.8	8.88	14.8	29.6	9.6	9.6	9.6	6.21	0.75	6	1.11	0.74	14.8	5.92	0.74	1.04
120				6.2	9.9	89	0	15	74	M	1	172.2	3.28	0.868	7.13	7.13	8.448	0	4.48	1.968	6.56	0.82	0.35	1.64	32.8	0	1.23	3	189	3.28	0.868	0	0.82	22.4	9.84	16.4	32.8	9.6	9.6	9.6	7.13	0.75	6	1.23	0.82	16.4	6.56	0.82	1.19
123				5.2	6.8	93	0	15	74	M	0	151.2	2.88	0.728	5.98	5.98	7.408	0	4.08	1.728	5.76	0.72	0.35	1.44	28.8	0	1.08	3	155.4	2.88	0.728	0	0.72	25.6	8.64	14.4	28.8	9.6	9.6	9.6	5.98	0.75	6	1.08	0.72	14.4	5.76	0.72	0.88
126				7.2	9.2	92	0	8	74	M	0	193.2	3.68	1.008	8.28	8.28	9.488	0	4.88	2.208	7.36	0.92	0.35	1.84	36.8	0	1.38	3	172.2	3.68	1.008	0	0.92	21.6	11.04	18.4	36.8	9.6	9.6	9.6	8.28	0.75	6	1.38	0.92	18.4	7.36	0.92	1.12
80				9	9.9	97	0	10	73	M	1	231	4.4	1.26	10.35	10.35	11.36	0	5.6	2.64	8.8	1.1	0.35	2.2	44	0	1.65	3	151.2	4.4	1.26	0	1.1	29.6	13.2	22	44	9.6	9.6	9.6	10.35	0.75	6	1.65	1.1	22	8.8	1.1	1.19
87				6.4	9.5	96	0	11	73	M	1	176.4	3.36	0.896	7.36	7.36	8.656	0	4.56	2.016	6.72	0.84	0.35	1.68	33.6	1.472	1.26	3	193.2	3.36	0.896	0	0.84	36.8	10.08	16.8	33.6	9.6	9.6	9.6	7.36	0.75	6	1.26	0.84	16.8	6.72	0.84	1.15
100				6.4	9.6	94	0	12	73	M	1	176.4	3.36	0.896	7.36	7.36	8.656	0	4.56	2.016	6.72	0.84	0.35	1.68	33.6	0	1.26	3	231	3.36	0.896	0	0.84	26.4	10.08	16.8	33.6	9.6	9.6	9.6	7.36	0.75	6	1.26	0.84	16.8	6.72	0.84	1.16
111				5.1	9.5	97	0	8	73	M	0	149.1	2.84	0.714	5.865	5.865	7.304	0	4.04	1.704	5.68	0.71	0.35	1.42	28.4	0	1.065	3	176.4	2.84	0.714	0	0.71	26.4	8.52	14.2	28.4	9.6	9.6	9.6	5.865	0.75	6	1.065	0.71	14.2	5.68	0.71	1.15
113				7	8.3	100	0	17	73	M	1	189	3.6	0.98	8.05	8.05	9.28	0	4.8	2.16	7.2	0.9	0.35	1.8	36	0	1.35	3	176.4	3.6	0.98	0	0.9	21.2	10.8	18	36	9.6	9.6	9.6	8.05	0.75	6	1.35	0.9	18	7.2	0.9	1.03
93				5	8.4	87	0	12	72	M	1	147	2.8	0.7	5.75	5.75	7.2	0	4	1.68	5.6	0.7	0.35	1.4	28	1.47	1.05	3	149.1	2.8	0.7	0	0.7	28.8	8.4	14	28	9.6	9.6	9.6	5.75	0.75	6	1.05	0.7	14	5.6	0.7	1.04
105				9.2	8.4	76	0	10	72	M	1	235.2	4.48	1.288	10.58	10.58	11.568	0	5.68	2.688	8.96	1.12	0.35	2.24	44.8	0	1.68	3	189	4.48	1.288	0	1.12	20.8	13.44	22.4	44.8	9.6	9.6	9.6	10.58	0.75	6	1.68	1.12	22.4	8.96	1.12	1.04
133				5.4	7.4	98	0	21	72	M	1	155.4	2.96	0.756	6.21	6.21	7.616	0	4.16	1.776	5.92	0.74	0.35	1.48	29.6	0	1.11	3	147	2.96	0.756	0	0.74	37.6	8.88	14.8	29.6	9.6	9.6	9.6	6.21	0.75	6	1.11	0.74	14.8	5.92	0.74	0.94
136				10.2	8.3	76	0	6	72	M	1	256.2	4.88	1.428	11.73	11.73	12.608	0	6.08	2.928	9.76	1.22	0.35	2.44	48.8	0	1.83	3	235.2	4.88	1.428	0	1.22	22.4	14.64	24.4	48.8	9.6	9.6	9.6	11.73	0.75	6	1.83	1.22	24.4	9.76	1.22	1.03
144				6.4	9.5	111	0	18	72	M	1	176.4	3.36	0.896	7.36	7.36	8.656	0	4.56	2.016	6.72	0.84	0.35	1.68	33.6	0	1.26	3	155.4	3.36	0.896	0	0.84	41.6	10.08	16.8	33.6	9.6	9.6	9.6	7.36	0.75	6	1.26	0.84	16.8	6.72	0.84	1.15
109				4.5	9.2	93	0	15	70	F	1	136.5	2.6	0.63	5.175	5.175	6.68	0	3.8	1.56	5.2	0.65	0.35	1.3	26	0	0.975	3	256.2	2.6	0.63	0	0.65	26.4	7.8	13	26	9.6	9.6	9.6	5.175	0.75	6	0.975	0.65	13	5.2	0.65	1.12
129				6.6	9.3	84	0	19	70	F	1	180.6	3.44	0.924	7.59	7.59	8.864	0	4.64	2.064	6.88	0.86	0.35	1.72	34.4	0	1.29	3	176.4	3.44	0.924	0	0.86	18.8	10.32	17.2	34.4	9.6	9.6	9.6	7.59	0.75	6	1.29	0.86	17.2	6.88	0.86	1.13
81				9.2	10.1	103	0	20	69	M	0	235.2	4.48	1.288	10.58	10.58	11.568	0	5.68	2.688	8.96	1.12	0.35	2.24	44.8	0	1.68	3	136.5	4.48	1.288	0	1.12	27.2	13.44	22.4	44.8	9.6	9.6	9.6	10.58	0.75	6	1.68	1.12	22.4	8.96	1.12	1.21
127				6.8	9.5	102	0	11	69	M	1	184.8	3.52	0.952	7.82	7.82	9.072	0	4.72	2.112	7.04	0.88	0.35	1.76	35.2	0	1.32	3	180.6	3.52	0.952	0	0.88	37.6	10.56	17.6	35.2	9.6	9.6	9.6	7.82	0.75	6	1.32	0.88	17.6	7.04	0.88	1.15
97				5.1	9.2	78	0	14	68	F	1	149.1	2.84	0.714	5.865	5.865	7.304	0	4.04	1.704	5.68	0.71	0.35	1.42	28.4	0	1.065	3	235.2	2.84	0.714	0	0.71	28	8.52	14.2	28.4	9.6	9.6	9.6	5.865	0.75	6	1.065	0.71	14.2	5.68	0.71	1.12
108				10.2	9.1	91	0	12	67	M	1	256.2	4.88	1.428	11.73	11.73	12.608	0	6.08	2.928	9.76	1.22	0.35	2.44	48.8	0	1.83	3	184.8	4.88	1.428	0	1.22	21.2	14.64	24.4	48.8	9.6	9.6	9.6	11.73	0.75	6	1.83	1.22	24.4	9.76	1.22	1.11
121				10.2	10.1	102	0	13	67	M	1	256.2	4.88	1.428	11.73	11.73	12.608	0	6.08	2.928	9.76	1.22	0.35	2.44	48.8	0	1.83	3	149.1	4.88	1.428	0	1.22	41.6	14.64	24.4	48.8	9.6	9.6	9.6	11.73	0.75	6	1.83	1.22	24.4	9.76	1.22	1.21
92				8.3	6.8	93	0	16	66	M	1	216.3	4.12	1.162	9.545	9.545	10.632	0	5.32	2.472	8.24	1.03	0.35	2.06	41.2	0	1.545	3	256.2	4.12	1.162	0	1.03	41.6	12.36	20.6	41.2	9.6	9.6	9.6	9.545	0.75	6	1.545	1.03	20.6	8.24	1.03	0.88
118				6.6	9	96	0	17	66	M	0	180.6	3.44	0.924	7.59	7.59	8.864	0	4.64	2.064	6.88	0.86	0.35	1.72	34.4	0	1.29	3	256.2	3.44	0.924	0	0.86	34	10.32	17.2	34.4	9.6	9.6	9.6	7.59	0.75	6	1.29	0.86	17.2	6.88	0.86	1.1
82				5	10.2	90	0	8	61	F	1	147	2.8	0.7	5.75	5.75	7.2	0	4	1.68	5.6	0.7	0.35	1.4	28	0	1.05	3	216.3	2.8	0.7	0	0.7	27.2	8.4	14	28	9.6	9.6	9.6	5.75	0.75	6	1.05	0.7	14	5.6	0.7	1.22
89				7	9.5	89	0	7	61	F	1	189	3.6	0.98	8.05	8.05	9.28	0	4.8	2.16	7.2	0.9	0.35	1.8	36	0	1.35	3	180.6	3.6	0.98	0	0.9	20.8	10.8	18	36	9.6	9.6	9.6	8.05	0.75	6	1.35	0.9	18	7.2	0.9	1.15
91				5.4	7.3	104	0	15	61	F	1	155.4	2.96	0.756	6.21	6.21	7.616	0	4.16	1.776	5.92	0.74	0.35	1.48	29.6	0	1.11	3	147	2.96	0.756	0	0.74	28.8	8.88	14.8	29.6	9.6	9.6	9.6	6.21	0.75	6	1.11	0.74	14.8	5.92	0.74	0.93
94				5.4	8.5	88	0	6	61	F	1	155.4	2.96	0.756	6.21	6.21	7.616	0	4.16	1.776	5.92	0.74	0.35	1.48	29.6	0	1.11	3	189	2.96	0.756	0	0.74	22.4	8.88	14.8	29.6	9.6	9.6	9.6	6.21	0.75	6	1.11	0.74	14.8	5.92	0.74	1.05
140				5.8	8.4	92	0	12	61	F	1	163.8	3.12	0.812	6.67	6.67	8.032	0	4.32	1.872	6.24	0.78	0.35	1.56	31.2	0	1.17	3	155.4	3.12	0.812	0	0.78	22.4	9.36	15.6	31.2	9.6	9.6	9.6	6.67	0.75	6	1.17	0.78	15.6	6.24	0.78	1.04
147				6.4	10.9	89	0	15	61	F	1	176.4	3.36	0.896	7.36	7.36	8.656	0	4.56	2.016	6.72	0.84	0.35	1.68	33.6	0	1.26	3	155.4	3.36	0.896	0	0.84	24	10.08	16.8	33.6	9.6	9.6	9.6	7.36	0.75	6	1.26	0.84	16.8	6.72	0.84	1.29
78				6.6	9.2	93	0	17	58	M	1	180.6	3.44	0.924	7.59	7.59	8.864	0	4.64	2.064	6.88	0.86	0.35	1.72	34.4	1.518	1.29	3	163.8	3.44	0.924	0	0.86	26.4	10.32	17.2	34.4	9.6	9.6	9.6	7.59	0.75	6	1.29	0.86	17.2	6.88	0.86	1.12
114				6.2	8.4	75	0	15	58	M	1	172.2	3.28	0.868	7.13	7.13	8.448	0	4.48	1.968	6.56	0.82	0.35	1.64	32.8	0	1.23	3	176.4	3.28	0.868	0	0.82	27.2	9.84	16.4	32.8	9.6	9.6	9.6	7.13	0.75	6	1.23	0.82	16.4	6.56	0.82	1.04
124				5.5	8.2	87	0	15	58	M	1	157.5	3	0.77	6.325	6.325	7.72	0	4.2	1.8	6	0.75	0.35	1.5	30	0	1.125	3	180.6	3	0.77	0	0.75	25.6	9	15	30	9.6	9.6	9.6	6.325	0.75	6	1.125	0.75	15	6	0.75	1.02
138				5.2	8.8	80	0	8	58	M	1	151.2	2.88	0.728	5.98	5.98	7.408	0	4.08	1.728	5.76	0.72	0.35	1.44	28.8	0	1.08	3	172.2	2.88	0.728	0	0.72	22.8	8.64	14.4	28.8	9.6	9.6	9.6	5.98	0.75	6	1.08	0.72	14.4	5.76	0.72	1.08
137				4.8	8.5	78	0	10	56	F	1	142.8	2.72	0.672	5.52	5.52	6.992	0	3.92	1.632	5.44	0.68	0.35	1.36	27.2	0	1.02	3	157.5	2.72	0.672	0	0.68	21.6	8.16	13.6	27.2	9.6	9.6	9.6	5.52	0.75	6	1.02	0.68	13.6	5.44	0.68	1.05
99				6.3	9.5	85	0	11	54	M	1	174.3	3.32	0.882	7.245	7.245	8.552	0	4.52	1.992	6.64	0.83	0.35	1.66	33.2	0	1.245	3	151.2	3.32	0.882	0	0.83	20	9.96	16.6	33.2	9.6	9.6	9.6	7.245	0.75	6	1.245	0.83	16.6	6.64	0.83	1.15
110				4.8	9.3	94	0	12	54	M	1	142.8	2.72	0.672	5.52	5.52	6.992	0	3.92	1.632	5.44	0.68	0.35	1.36	27.2	1.104	1.02	3	142.8	2.72	0.672	0	0.68	26	8.16	13.6	27.2	9.6	9.6	9.6	5.52	0.75	6	1.02	0.68	13.6	5.44	0.68	1.13
139				5.5	9.2	91	0	8	44	M	1	157.5	3	0.77	6.325	6.325	7.72	0	4.2	1.8	6	0.75	0.35	1.5	30	0	1.125	3	174.3	3	0.77	0	0.75	20	9	15	30	9.6	9.6	9.6	6.325	0.75	6	1.125	0.75	15	6	0.75	1.12
96				6.2	8.8	91	1	15	32	F	1	172.2	3.28	0.868	7.13	7.13	8.448	0	4.48	1.968	6.56	0.82	0.35	1.64	32.8	0	1.23	3	142.8	3.28	0.868	6.3756	0.82	22.8	9.84	16.4	32.8	9.6	9.6	9.6	7.13	0.75	6	1.23	0.82	16.4	6.56	0.82	1.08
115				7.8	8.8	87	0	22	32	F	1	205.8	3.92	1.092	8.97	8.97	10.112	0	5.12	2.352	7.84	0.98	0.35	1.96	39.2	0	1.47	3	157.5	3.92	1.092	0	0.98	25.6	11.76	19.6	39.2	9.6	9.6	9.6	8.97	0.75	6	1.47	0.98	19.6	7.84	0.98	1.08
119				6	9.6	76	0	17	32	F	1	168	3.2	0.84	6.9	6.9	8.24	0	4.4	1.92	6.4	0.8	0.35	1.6	32	0	1.2	3	172.2	3.2	0.84	0	0.8	32	9.6	16	32	9.6	9.6	9.6	6.9	0.75	6	1.2	0.8	16	6.4	0.8	1.16
122				5.1	7	104	0	21	32	F	1	149.1	2.84	0.714	5.865	5.865	7.304	0	4.04	1.704	5.68	0.71	0.35	1.42	28.4	0	1.065	3	205.8	2.84	0.714	0	0.71	24.8	8.52	14.2	28.4	9.6	9.6	9.6	5.865	0.75	6	1.065	0.71	14.2	5.68	0.71	0.9
131				5.4	9.6	94	0	6	32	F	1	155.4	2.96	0.756	6.21	6.21	7.616	0	4.16	1.776	5.92	0.74	0.35	1.48	29.6	0	1.11	3	168	2.96	0.756	0	0.74	21.2	8.88	14.8	29.6	9.6	9.6	9.6	6.21	0.75	6	1.11	0.74	14.8	5.92	0.74	1.16
76				8.1	7.8	80	0	18	23	F	1	212.1	4.04	1.134	9.315	9.315	10.424	0	5.24	2.424	8.08	1.01	0.35	2.02	40.4	0	1.515	3	149.1	4.04	1.134	0	1.01	22.4	12.12	20.2	40.4	9.6	9.6	9.6	9.315	0.75	6	1.515	1.01	20.2	8.08	1.01	0.98
101				6.2	10.2	96	0	15	23	F	1	172.2	3.28	0.868	7.13	7.13	8.448	0	4.48	1.968	6.56	0.82	0.35	1.64	32.8	0	1.23	3	155.4	3.28	0.868	0	0.82	33.2	9.84	16.4	32.8	9.6	9.6	9.6	7.13	0.75	6	1.23	0.82	16.4	6.56	0.82	1.22
102				7.2	10.3	99	0	19	23	F	1	193.2	3.68	1.008	8.28	8.28	9.488	0	4.88	2.208	7.36	0.92	0.35	1.84	36.8	0	1.38	3	212.1	3.68	1.008	0	0.92	25.6	11.04	18.4	36.8	9.6	9.6	9.6	8.28	0.75	6	1.38	0.92	18.4	7.36	0.92	1.23
134				6	6.8	92	0	20	23	F	1	168	3.2	0.84	6.9	6.9	8.24	0	4.4	1.92	6.4	0.8	0.35	1.6	32	1.38	1.2	3	172.2	3.2	0.84	0	0.8	29.6	9.6	16	32	9.6	9.6	9.6	6.9	0.75	6	1.2	0.8	16	6.4	0.8	0.88
86				6.3	9.2	89	0	7	21	M	1	174.3	3.32	0.882	7.245	7.245	8.552	0	4.52	1.992	6.64	0.83	0.35	1.66	33.2	0	1.245	3	193.2	3.32	0.882	0	0.83	24.8	9.96	16.6	33.2	9.6	9.6	9.6	7.245	0.75	6	1.245	0.83	16.6	6.64	0.83	1.12
142				6.4	8.8	97	0	6	21	M	1	176.4	3.36	0.896	7.36	7.36	8.656	0	4.56	2.016	6.72	0.84	0.35	1.68	33.6	0	1.26	3	168	3.36	0.896	0	0.84	26	10.08	16.8	33.6	9.6	9.6	9.6	7.36	0.75	6	1.26	0.84	16.8	6.72	0.84	1.08
[truncated: 5,000 more columns]

## Sheet: Environmental
duration of surgery	CIT	WIT	HVAC	OR1 Halogen	LED bulb	Electrosurgical unit	Argon beamer	Mattress heater	EPM	Stocking	Bed space	Table	PC	US	Wall monitor	Water heater	Cell saver	ROTEM	Rx	HVAC	OR2 Halogen	LED bulb	MP	PC	Halogen lighting	Recovery room	Staff area ventilation	OR area ventilation	Fridge1	Fridge2	Fridge3	Blood heater	Microwave	Steriliser	Gas	PC	Nurse ventilation	Nurse halogen	Nurse PC1	Nurse PC2	Relaxation halogen	Relaxation PC	HEPA	VA	Infection	Consumables	Single-use	Sterile wrap	Total Energy
6.7	9.3		182.7	3.48	0.938	7.705	7.705	8.968	9.3	4.68	2.088	6.96	0.87	0.35	1.74	34.8	1.541	1.305	3	182.7	3.48	0.938	0	0.87	27.6	10.44	17.4	34.8	9.6	9.6	9.6	7.705	0.75	6	1.305	0.87	17.4	6.96	0.87	1.13	10.44	0.87	34.8	127.3	6.5	10.1	4.8	2.1	674.258
6.1	8.4		170.1	3.24	0.854	7.015	7.015	8.344	9.3	4.44	1.944	6.48	0.81	0.35	1.62	32.4	0	1.215	3	170.1	3.24	0.854	0	0.81	27.6	9.72	16.2	32.4	9.6	9.6	9.6	7.015	0.75	6	1.215	0.81	16.2	6.48	0.81	1.04	9.72	0.81	32.4	115.9	5.2	11.4	5.6	1.8	631.101
9	8.2		231	4.4	1.26	10.35	10.35	11.36	9.3	5.6	2.64	8.8	1.1	0.35	2.2	44	0	1.65	3	182.7	4.4	1.26	0	1.1	25.2	13.2	22	44	9.6	9.6	9.6	10.35	0.75	6	1.65	1.1	22	8.8	1.1	1.02	13.2	1.1	44	171	5.5	11.5	5.6	1.8	781.09
6.7	9.9		182.7	3.48	0.938	7.705	7.705	8.968	9.3	4.68	2.088	6.96	0.87	0.35	1.74	34.8	0	1.305	3	170.1	3.48	0.938	0	0.87	36.8	10.44	17.4	34.8	9.6	9.6	9.6	7.705	0.75	6	1.305	0.87	17.4	6.96	0.87	1.19	10.44	0.87	34.8	127.3	7.1	10.6	5	1.52	669.377
6	9.5		168	3.2	0.84	6.9	6.9	8.24	9.3	4.4	1.92	6.4	0.8	0.35	1.6	32	0	1.2	3	231	3.2	0.84	0	0.8	27.6	9.6	16	32	9.6	9.6	9.6	6.9	0.75	6	1.2	0.8	16	6.4	0.8	1.15	9.6	0.8	32	114	5.8	12.8	6.6	2	687.29
7.2	8.5		193.2	3.68	1.008	8.28	8.28	9.488	9.3	4.88	2.208	7.36	0.92	0.35	1.84	36.8	0	1.38	3	182.7	3.68	1.008	0	0.92	24.8	11.04	18.4	36.8	9.6	9.6	9.6	8.28	0.75	6	1.38	0.92	18.4	7.36	0.92	1.05	11.04	0.92	36.8	136.8	7.2	10.2	5.2	1.6	693.942
4.5	10.2		136.5	2.6	0.63	5.175	5.175	6.68	9.3	3.8	1.56	5.2	0.65	0.35	1.3	26	0	0.975	3	168	2.6	0.63	0	0.65	29.6	7.8	13	26	9.6	9.6	9.6	5.175	0.75	6	0.975	0.65	13	5.2	0.65	1.22	7.8	0.65	26	85.5	6.4	11.5	5.8	2.2	554.045
8.1	9.3		212.1	4.04	1.134	9.315	9.315	10.424	9.3	5.24	2.424	8.08	1.01	0.35	2.02	40.4	0	1.515	3	193.2	4.04	1.134	0	1.01	18.8	12.12	20.2	40.4	9.6	9.6	9.6	9.315	0.75	6	1.515	1.01	20.2	8.08	1.01	1.13	12.12	1.01	40.4	153.9	5.5	10.3	4.6	1.8	741.911
6.2	6.8		172.2	3.28	0.868	7.13	7.13	8.448	9.2	4.48	1.968	6.56	0.82	0.35	1.64	32.8	1.43	1.23	3	136.5	3.28	0.868	0	0.82	33.2	9.84	16.4	32.8	9.6	9.6	9.6	7.13	0.75	6	1.23	0.82	16.4	6.56	0.82	0.88	9.84	0.82	32.8	117.8	6.8	12.2	4.8	2.1	609.092
6.8	9.5		184.8	3.52	0.952	7.82	7.82	9.072	9.2	4.72	2.112	7.04	0.88	0.35	1.76	35.2	0	1.32	3	212.1	3.52	0.952	0	0.88	25.6	10.56	17.6	35.2	9.6	9.6	9.6	7.82	0.75	6	1.32	0.88	17.6	7.04	0.88	1.15	10.56	0.88	35.2	129.2	5.5	13.1	6.2	1.7	704.858
4.8	9.9		142.8	2.72	0.672	5.52	5.52	6.992	9.2	3.92	1.632	5.44	0.68	0.35	1.36	27.2	0	1.02	3	172.2	2.72	0.672	0	0.68	28	8.16	13.6	27.2	9.6	9.6	9.6	5.52	0.75	6	1.02	0.68	13.6	5.44	0.68	1.19	8.16	0.68	27.2	91.2	6.5	10.1	4.8	2.2	570.978
6.6	8.4		180.6	3.44	0.924	7.59	7.59	8.864	9.2	4.64	2.064	6.88	0.86	0.35	1.72	34.4	0	1.29	3	184.8	3.44	0.924	0	0.86	20	10.32	17.2	34.4	9.6	9.6	9.6	7.59	0.75	6	1.29	0.86	17.2	6.88	0.86	1.04	10.32	0.86	34.4	125.4	6.4	11.5	5.8	1.8	662.206
5.8	10.1		163.8	3.12	0.812	6.67	6.67	8.032	9.2	4.32	1.872	6.24	0.78	0.35	1.56	31.2	0	1.17	3	142.8	3.12	0.812	0	0.78	27.2	9.36	15.6	31.2	9.6	9.6	9.6	6.67	0.75	6	1.17	0.78	15.6	6.24	0.78	1.21	9.36	0.78	31.2	110.2	5.5	10.3	4.6	1.9	589.008
8.3	7.8		216.3	4.12	1.162	9.545	9.545	10.632	9.2	5.32	2.472	8.24	1.03	0.35	2.06	41.2	0	1.545	3	180.6	4.12	1.162	0	1.03	24	12.36	20.6	41.2	9.6	9.6	9.6	9.545	0.75	6	1.545	1.03	20.6	8.24	1.03	0.98	12.36	1.03	41.2	157.7	7.1	10.6	5	1.5	743.903
6.3	8.6		174.3	3.32	0.882	7.245	7.245	8.552	9.2	4.52	1.992	6.64	0.83	0.35	1.66	33.2	0	1.245	3	163.8	3.32	0.882	0	0.83	34	9.96	16.6	33.2	9.6	9.6	9.6	7.245	0.75	6	1.245	0.83	16.6	6.64	0.83	1.06	9.96	0.83	33.2	119.7	5.8	12.8	6.6	2.1	640.763
5	10.3		147	2.8	0.7	5.75	5.75	7.2	9.2	4	1.68	5.6	0.7	0.35	1.4	28	0	1.05	3	216.3	2.8	0.7	0	0.7	26	8.4	14	28	9.6	9.6	9.6	5.75	0.75	6	1.05	0.7	14	5.6	0.7	1.23	8.4	0.7	28	95	7.2	10.2	5.2	1.9	622.76
6.7	9.6		182.7	3.48	0.938	7.705	7.705	8.968	9.2	4.68	2.088	6.96	0.87	0.35	1.74	34.8	0	1.305	3	174.3	3.48	0.938	0	0.87	20.8	10.44	17.4	34.8	9.6	9.6	9.6	7.705	0.75	6	1.305	0.87	17.4	6.96	0.87	1.16	10.44	0.87	34.8	127.3	5.5	11.4	5.2	1.9	657.447
5.1	8.6		149.1	2.84	0.714	5.865	5.865	7.304	9.1	4.04	1.704	5.68	0.71	0.35	1.42	28.4	0	1.065	3	147	2.84	0.714	0	0.71	27.6	8.52	14.2	28.4	9.6	9.6	9.6	5.865	0.75	6	1.065	0.71	14.2	5.68	0.71	1.06	8.52	0.71	28.4	96.9	6.8	12.2	4.8	2.2	559.611
6.2	8.4		172.2	3.28	0.868	7.13	7.13	8.448	9	4.48	1.968	6.56	0.82	0.35	1.64	32.8	1.426	1.23	3	179.76	3.28	0.868	0	0.82	25.6	9.84	16.4	32.8	9.6	9.6	9.6	7.13	0.75	6	1.23	0.82	16.4	6.56	0.82	0.9	9.84	0.82	32.8	117.8	5.5	10.2	4.6	1.6	644.568
10.2	8.2		256.2	4.88	1.428	11.73	11.73	12.608	9	6.08	2.928	9.76	1.22	0.35	2.44	48.8	0	1.83	3	149.1	4.88	1.428	0	1.22	25.6	14.64	24.4	48.8	9.6	9.6	9.6	11.73	0.75	6	1.83	1.22	24.4	9.76	1.22	1.02	14.64	1.22	48.8	193.8	7.1	10.6	5	2.2	805.442
7.8	9.6		205.8	3.92	1.092	8.97	8.97	10.112	9	5.12	2.352	7.84	0.98	0.35	1.96	39.2	0	1.47	3	172.2	3.92	1.092	5.742	0.98	41.6	11.76	19.6	39.2	9.6	9.6	9.6	8.97	0.75	6	1.47	0.98	19.6	7.84	0.98	1.16	11.76	0.98	39.2	148.2	5.8	12.8	6.6	2.4	734.72
5.2	9.5		151.2	2.88	0.728	5.98	5.98	7.408	9	4.08	1.728	5.76	0.72	0.35	1.44	28.8	0	1.08	3	256.2	2.88	0.728	0	0.72	32	8.64	14.4	28.8	9.6	9.6	9.6	5.98	0.75	6	1.08	0.72	14.4	5.76	0.72	1.15	8.64	0.72	28.8	98.8	4.9	10.4	5.5	1.9	678.022
6.7	8.5		182.7	3.48	0.938	7.705	7.705	8.968	9	4.68	2.088	6.96	0.87	0.35	1.74	34.8	0	1.305	3	205.8	3.48	0.938	0	0.87	21.6	10.44	17.4	34.8	9.6	9.6	9.6	7.705	0.75	6	1.305	0.87	17.4	6.96	0.87	1.05	10.44	0.87	34.8	127.3	5.3	12	4.2	1.9	689.437
6.1	10.2		170.1	3.24	0.854	7.015	7.015	8.344	9	4.44	1.944	6.48	0.81	0.35	1.62	32.4	0	1.215	3	151.2	3.24	0.854	0	0.81	27.6	9.72	16.2	32.4	9.6	9.6	9.6	7.015	0.75	6	1.215	0.81	16.2	6.48	0.81	1.22	9.72	0.81	32.4	115.9	5.8	11.2	4.9	2.1	612.081
9	9.2		231	4.4	1.26	10.35	10.35	11.36	9	5.6	2.64	8.8	1.1	0.35	2.2	44	0	1.65	3	182.7	4.4	1.26	0	1.1	25.2	13.2	22	44	9.6	9.6	9.6	10.35	0.75	6	1.65	1.1	22	8.8	1.1	1.12	13.2	1.1	44	171	5.6	10.7	6.1	1.7	780.89
6.4	8.8		176.4	3.36	0.896	7.36	7.36	8.656	9	4.56	2.016	6.72	0.84	0.35	1.68	33.6	0	1.26	3	170.1	3.36	0.896	0	0.84	36.8	10.08	16.8	33.6	9.6	9.6	9.6	7.36	0.75	6	1.26	0.84	16.8	6.72	0.84	1.08	10.08	0.84	33.6	121.6	6.2	11.3	5.4	2.2	654.504
6	7.8		168	3.2	0.84	6.9	6.9	8.24	8.9	4.4	1.92	6.4	0.8	0.35	1.6	32	0	1.2	3	231	3.2	0.84	0	0.8	26.4	9.6	16	32	9.6	9.6	9.6	6.9	0.75	6	1.2	0.8	16	6.4	0.8	0.98	9.6	0.8	32	114	6.6	11.4	4.7	1.9	685.52
7.2	9.3		193.2	3.68	1.008	8.28	8.28	9.488	8.9	4.88	2.208	7.36	0.92	0.35	1.84	36.8	0	1.38	3	176.4	3.68	1.008	0	0.92	24.8	11.04	18.4	36.8	9.6	9.6	9.6	8.28	0.75	6	1.38	0.92	18.4	7.36	0.92	1.13	11.04	0.92	36.8	136.8	5.2	11.2	5.6	1.5	687.322
4.5	8.4		136.5	2.6	0.63	5.175	5.175	6.68	8.9	3.8	1.56	5.2	0.65	0.35	1.3	26	0	0.975	3	168	2.6	0.63	0	0.65	29.6	7.8	13	26	9.6	9.6	9.6	5.175	0.75	6	0.975	0.65	13	5.2	0.65	1.04	7.8	0.65	26	85.5	6.2	9.8	4.4	2.1	553.465
5.4	8.3		155.4	2.96	0.756	6.21	6.21	7.616	8.9	4.16	1.776	5.92	0.74	0.35	1.48	29.6	0	1.11	3	193.2	2.96	0.756	0	0.74	18.8	8.88	14.8	29.6	9.6	9.6	9.6	6.21	0.75	6	1.11	0.74	14.8	5.92	0.74	1.03	8.88	0.74	29.6	102.6	5.2	11.4	5.6	1.4	611.244
5.5	9.9		157.5	3	0.77	6.325	6.325	7.72	8.9	4.2	1.8	6	0.75	0.35	1.5	30	0	1.125	3	136.5	3	0.77	0	0.75	22.4	9	15	30	9.6	9.6	9.6	6.325	0.75	6	1.125	0.75	15	6	0.75	1.19	9	0.75	30	104.5	5.5	11.5	5.6	1.6	563.125
5.4	9.5		155.4	2.96	0.756	6.21	6.21	7.616	8.9	4.16	1.776	5.92	0.74	0.35	1.48	29.6	0	1.11	3	155.4	2.96	0.756	0	0.74	22.8	8.88	14.8	29.6	9.6	9.6	9.6	6.21	0.75	6	1.11	0.74	14.8	5.92	0.74	1.15	8.88	0.74	29.6	102.6	6.8	12.2	4.8	2.1	577.564
6.4	8.5		176.4	3.36	0.896	7.36	7.36	8.656	8.9	4.56	2.016	6.72	0.84	0.35	1.68	33.6	0	1.26	3	157.5	3.36	0.896	0	0.84	22.4	10.08	16.8	33.6	9.6	9.6	9.6	7.36	0.75	6	1.26	0.84	16.8	6.72	0.84	1.05	10.08	0.84	33.6	121.6	5.5	13.1	6.2	1.8	627.374
9.2	10.2		235.2	4.48	1.288	10.58	10.58	11.568	8.9	5.68	2.688	8.96	1.12	0.35	2.24	44.8	0	1.68	3	155.4	4.48	1.288	0	1.12	26.4	13.44	22.4	44.8	9.6	9.6	9.6	10.58	0.75	6	1.68	1.12	22.4	8.96	1.12	1.22	13.44	1.12	44.8	174.8	6.5	10.1	4.8	1.8	764.432
7.2	9.4		193.2	3.68	1.008	8.28	8.28	9.488	8.4	4.88	2.208	7.36	0.92	0.35	1.84	36.8	0	1.38	3	196.56	3.68	1.008	5.742	0.92	37.6	11.04	18.4	36.8	9.6	9.6	9.6	8.28	0.75	6	1.38	0.92	18.4	7.36	0.92	1.1	11.04	0.92	36.8	136.8	6.4	12.9	5.6	2.4	725.494
4.5	8.3		136.5	2.6	0.63	5.175	5.175	6.68	8.4	3.8	1.56	5.2	0.65	0.35	1.3	26	1.035	0.975	3	235.2	2.6	0.63	6.138	0.65	29.6	7.8	13	26	9.6	9.6	9.6	5.175	0.75	6	0.975	0.65	13	5.2	0.65	1.03	7.8	0.65	26	85.5	6.4	12.2	6.1	2.4	627.328
8.1	9.9		212.1	4.04	1.134	9.315	9.315	10.424	8.4	5.24	2.424	8.08	1.01	0.35	2.02	40.4	0	1.515	3	193.2	4.04	1.134	0	1.01	18.8	12.12	20.2	40.4	9.6	9.6	9.6	9.315	0.75	6	1.515	1.01	20.2	8.08	1.01	1.19	12.12	1.01	40.4	153.9	6.2	11.3	5.4	1.9	741.071
5.5	7.8		157.5	3	0.77	6.325	6.325	7.72	8.4	4.2	1.8	6	0.75	0.35	1.5	30	0	1.125	3	136.5	3	0.77	0	0.75	33.2	9	15	30	9.6	9.6	9.6	6.325	0.75	6	1.125	0.75	15	6	0.75	0.98	9	0.75	30	104.5	5.2	11.2	5.6	2	573.215
5.4	8.6		155.4	2.96	0.756	6.21	6.21	7.616	8.4	4.16	1.776	5.92	0.74	0.35	1.48	29.6	0	1.11	3	212.1	2.96	0.756	0	0.74	22.8	8.88	14.8	29.6	9.6	9.6	9.6	6.21	0.75	6	1.11	0.74	14.8	5.92	0.74	1.06	8.88	0.74	29.6	102.6	6.2	9.8	4.4	1.6	633.674
6.4	10.3		176.4	3.36	0.896	7.36	7.36	8.656	8.4	4.56	2.016	6.72	0.84	0.35	1.68	33.6	0	1.26	3	157.5	3.36	0.896	0	0.84	22.4	10.08	16.8	33.6	9.6	9.6	9.6	7.36	0.75	6	1.26	0.84	16.8	6.72	0.84	1.23	10.08	0.84	33.6	121.6	6.2	10.8	5.4	2.2	627.054
9.2	9.2		235.2	4.48	1.288	10.58	10.58	11.568	8.4	5.68	2.688	8.96	1.12	0.35	2.24	44.8	2.116	1.68	3	155.4	4.48	1.288	0	1.12	26.4	13.44	22.4	44.8	9.6	9.6	9.6	10.58	0.75	6	1.68	1.12	22.4	8.96	1.12	1.12	13.44	1.12	44.8	174.8	5.4	11.4	5.8	1.8	765.948
6.7	9.2		182.7	3.48	0.938	7.705	7.705	8.968	8.4	4.68	2.088	6.96	0.87	0.35	1.74	34.8	0	1.305	3	176.4	3.48	0.938	0	0.87	37.6	10.44	17.4	34.8	9.6	9.6	9.6	7.705	0.75	6	1.305	0.87	17.4	6.96	0.87	1.12	10.44	0.87	34.8	127.3	6.6	11.4	4.7	1.8	675.507
4.5	8.4		136.5	2.6	0.63	5.175	5.175	6.68	8.4	3.8	1.56	5.2	0.65	0.35	1.3	26	0	0.975	3	235.2	2.6	0.63	0	0.65	27.6	7.8	13	26	9.6	9.6	9.6	5.175	0.75	6	0.975	0.65	13	5.2	0.65	1.04	7.8	0.65	26	85.5	6.2	11.3	5.4	1.8	618.165
5.4	10.3		155.4	2.96	0.756	6.21	6.21	7.616	6.6	4.16	1.776	5.92	0.74	0.35	1.48	29.6	0	1.11	3	182.7	2.96	0.756	0	0.74	18.8	8.88	14.8	29.6	9.6	9.6	9.6	6.21	0.75	6	1.11	0.74	14.8	5.92	0.74	1.23	8.88	0.74	29.6	102.6	6.2	11.3	5.4	1.6	598.644
6.2	9.2		172.2	3.28	0.868	7.13	7.13	8.448	6.6	4.48	1.968	6.56	0.82	0.35	1.64	32.8	0	1.23	3	136.5	3.28	0.868	0	0.82	22.4	9.84	16.4	32.8	9.6	9.6	9.6	7.13	0.75	6	1.23	0.82	16.4	6.56	0.82	1.12	9.84	0.82	32.8	117.8	4.9	10.4	5.5	2.1	594.502
10.2	9.4		256.2	4.88	1.428	11.73	11.73	12.608	6.6	6.08	2.928	9.76	1.22	0.35	2.44	48.8	2.346	1.83	3	155.4	4.88	1.428	0	1.22	25.6	14.64	24.4	48.8	9.6	9.6	9.6	11.73	0.75	6	1.83	1.22	24.4	9.76	1.22	1.14	14.64	1.22	48.8	193.8	5.3	12	4.2	1.8	811.808
8.1	8.2		212.1	4.04	1.134	9.315	9.315	10.424	6.6	5.24	2.424	8.08	1.01	0.35	2.02	40.4	1.863	1.515	3	172.2	4.04	1.134	0	1.01	41.6	12.12	20.2	40.4	9.6	9.6	9.6	9.315	0.75	6	1.515	1.01	20.2	8.08	1.01	1.02	12.12	1.01	40.4	153.9	6.2	10.8	5.4	1.9	742.764
5.2	9.6		151.2	2.88	0.728	5.98	5.98	7.408	6.6	4.08	1.728	5.76	0.72	0.35	1.44	28.8	0	1.08	3	256.2	2.88	0.728	0	0.72	33.2	8.64	14.4	28.8	9.6	9.6	9.6	5.98	0.75	6	1.08	0.72	14.4	5.76	0.72	1.16	8.64	0.72	28.8	98.8	5.4	11.4	5.8	1.52	676.832
6.7	9.2		182.7	3.48	0.938	7.705	7.705	8.968	6.6	4.68	2.088	6.96	0.87	0.35	1.74	34.8	0	1.305	3	212.1	3.48	0.938	0	0.87	21.6	10.44	17.4	34.8	9.6	9.6	9.6	7.705	0.75	6	1.305	0.87	17.4	6.96	0.87	1.12	10.44	0.87	34.8	127.3	6.6	11.4	4.7	2	693.407
6.1	8.4		170.1	3.24	0.854	7.015	7.015	8.344	6.6	4.44	1.944	6.48	0.81	0.35	1.62	32.4	0	1.215	3	151.2	3.24	0.854	0	0.81	27.6	9.72	16.2	32.4	9.6	9.6	9.6	7.015	0.75	6	1.215	0.81	16.2	6.48	0.81	1.04	9.72	0.81	32.4	115.9	5.2	11.2	5.6	1.6	609.501
9	10.1		231	4.4	1.26	10.35	10.35	11.36	6.6	5.6	2.64	8.8	1.1	0.35	2.2	44	0	1.65	3	182.7	4.4	1.26	0	1.1	25.2	13.2	22	44	9.6	9.6	9.6	10.35	0.75	6	1.65	1.1	22	8.8	1.1	1.21	13.2	1.1	44	171	6.2	9.8	4.4	2.2	778.58
6.8	9.2		184.8	3.52	0.952	7.82	7.82	9.072	6.5	4.72	2.112	7.04	0.88	0.35	1.76	35.2	0	1.32	3	170.1	3.52	0.952	0	0.88	36.8	10.56	17.6	35.2	9.6	9.6	9.6	7.82	0.75	6	1.32	0.88	17.6	7.04	0.88	1.12	10.56	0.88	35.2	129.2	6.2	10.8	5.4	2.1	671.328
4.8	8.4		142.8	2.72	0.672	5.52	5.52	6.992	6.5	3.92	1.632	5.44	0.68	0.35	1.36	27.2	0	1.02	3	231	2.72	0.672	0	0.68	28	8.16	13.6	27.2	9.6	9.6	9.6	5.52	0.75	6	1.02	0.68	13.6	5.44	0.68	1.04	8.16	0.68	27.2	91.2	5.4	11.4	5.8	1.9	626.928
5.4	10.1		155.4	2.96	0.756	6.21	6.21	7.616	6.5	4.16	1.776	5.92	0.74	0.35	1.48	29.6	1.242	1.11	3	184.8	2.96	0.756	0	0.74	20	8.88	14.8	29.6	9.6	9.6	9.6	6.21	0.75	6	1.11	0.74	14.8	5.92	0.74	1.21	8.88	0.74	29.6	102.6	6.6	11.4	4.7	1.52	603.066
5.8	9.2		163.8	3.12	0.812	6.67	6.67	8.032	6.5	4.32	1.872	6.24	0.78	0.35	1.56	31.2	0	1.17	3	142.8	3.12	0.812	0	0.78	22.4	9.36	15.6	31.2	9.6	9.6	9.6	6.67	0.75	6	1.17	0.78	15.6	6.24	0.78	1.12	9.36	0.78	31.2	110.2	5.5	13.1	6.2	2.1	581.418
8.3	8.8		216.3	4.12	1.162	9.545	9.545	10.632	6.5	5.32	2.472	8.24	1.03	0.35	2.06	41.2	0	1.545	3	155.4	4.12	1.162	0	1.03	24	12.36	20.6	41.2	9.6	9.6	9.6	9.545	0.75	6	1.545	1.03	20.6	8.24	1.03	1.08	12.36	1.03	41.2	157.7	6.5	10.1	4.8	1.8	716.103
6.3	7.2		174.3	3.32	0.882	7.245	7.245	8.552	6.5	4.52	1.992	6.64	0.83	0.35	1.66	33.2	0	1.245	3	163.8	3.32	0.882	0	0.83	34	9.96	16.6	33.2	9.6	9.6	9.6	7.245	0.75	6	1.245	0.83	16.6	6.64	0.83	0.92	9.96	0.83	33.2	119.7	5.2	11.4	5.6	1.8	637.923
5	9.3		147	2.8	0.7	5.75	5.75	7.2	6.5	4	1.68	5.6	0.7	0.35	1.4	28	0	1.05	3	216.3	2.8	0.7	0	0.7	26	8.4	14	28	9.6	9.6	9.6	5.75	0.75	6	1.05	0.7	14	5.6	0.7	1.13	8.4	0.7	28	95	5.5	11.5	5.6	1.9	619.96
7	8.4		189	3.6	0.98	8.05	8.05	9.28	6.5	4.8	2.16	7.2	0.9	0.35	1.8	36	0	1.35	3	174.3	3.6	0.98	0	0.9	20.8	10.8	18	36	9.6	9.6	9.6	8.05	0.75	6	1.35	0.9	18	7.2	0.9	1.04	10.8	0.9	36	133	6.8	12.2	4.8	1.9	669.09
5.4	9.5		155.4	2.96	0.756	6.21	6.21	7.616	6.4	4.16	1.776	5.92	0.74	0.35	1.48	29.6	0	1.11	3	147	2.96	0.756	0	0.74	28.8	8.88	14.8	29.6	9.6	9.6	9.6	6.21	0.75	6	1.11	0.74	14.8	5.92	0.74	1.15	8.88	0.74	29.6	102.6	7.2	10.2	5.2	1.5	572.664
6.4	9.4		176.4	3.36	0.896	7.36	7.36	8.656	6.4	4.56	2.016	6.72	0.84	0.35	1.68	33.6	0	1.26	3	189	3.36	0.896	0	0.84	22.4	10.08	16.8	33.6	9.6	9.6	9.6	7.36	0.75	6	1.26	0.84	16.8	6.72	0.84	1.14	10.08	0.84	33.6	121.6	6.4	11.5	5.8	2.1	656.464
9.2	8.3		235.2	4.48	1.288	10.58	10.58	11.568	6.4	5.68	2.688	8.96	1.12	0.35	2.24	44.8	0	1.68	3	155.4	4.48	1.288	0	1.12	26.4	13.44	22.4	44.8	9.6	9.6	9.6	10.58	0.75	6	1.68	1.12	22.4	8.96	1.12	1.03	13.44	1.12	44.8	174.8	5.5	10.3	4.6	1.9	761.742
7	10.1		189	3.6	0.98	8.05	8.05	9.28	6.4	4.8	2.16	7.2	0.9	0.35	1.8	36	0	1.35	3	176.4	3.6	0.98	0	0.9	37.6	10.8	18	36	9.6	9.6	9.6	8.05	0.75	6	1.35	0.9	18	7.2	0.9	1.21	10.8	0.9	36	133	5.6	10.7	6.1	1.6	688.06
6.2	7.8		172.2	3.28	0.868	7.13	7.13	8.448	6.4	4.48	1.968	6.56	0.82	0.35	1.64	32.8	0	1.23	3	235.2	3.28	0.868	0	0.82	28.8	9.84	16.4	32.8	9.6	9.6	9.6	7.13	0.75	6	1.23	0.82	16.4	6.56	0.82	0.98	9.84	0.82	32.8	117.8	6.2	11.3	5.4	2.1	699.262
6.8	8.6		184.8	3.52	0.952	7.82	7.82	9.072	6.4	4.72	2.112	7.04	0.88	0.35	1.76	35.2	0	1.32	3	189	3.52	0.952	0	0.88	25.6	10.56	17.6	35.2	9.6	9.6	9.6	7.82	0.75	6	1.32	0.88	17.6	7.04	0.88	1.06	10.56	0.88	35.2	129.2	4.9	10.4	5.5	1.8	678.868
4.8	10.3		142.8	2.72	0.672	5.52	5.52	6.992	6.4	3.92	1.632	5.44	0.68	0.35	1.36	27.2	0	1.02	3	172.2	2.72	0.672	0	0.68	28	8.16	13.6	27.2	9.6	9.6	9.6	5.52	0.75	6	1.02	0.68	13.6	5.44	0.68	1.23	8.16	0.68	27.2	91.2	5.3	12	4.2	1.8	568.218
5.4	9.2		155.4	2.96	0.756	6.21	6.21	7.616	6.4	4.16	1.776	5.92	0.74	0.35	1.48	29.6	0	1.11	3	184.8	2.96	0.756	0	0.74	20	8.88	14.8	29.6	9.6	9.6	9.6	6.21	0.75	6	1.11	0.74	14.8	5.92	0.74	1.12	8.88	0.74	29.6	102.6	5.8	11.2	4.9	1.9	601.634
7.8	9.5		205.8	3.92	1.092	8.97	8.97	10.112	5.8	5.12	2.352	7.84	0.98	0.35	1.96	39.2	0	1.47	3	142.8	3.92	1.092	0	0.98	22.4	11.76	19.6	39.2	9.6	9.6	9.6	8.97	0.75	6	1.47	0.98	19.6	7.84	0.98	1.15	11.76	0.98	39.2	148.2	5.2	11.4	5.6	2.2	677.168
5.1	8.5		149.1	2.84	0.714	5.865	5.865	7.304	5.8	4.04	1.704	5.68	0.71	0.35	1.42	28.4	0	1.065	3	155.4	2.84	0.714	0	0.71	32	8.52	14.2	28.4	9.6	9.6	9.6	5.865	0.75	6	1.065	0.71	14.2	5.68	0.71	1.05	8.52	0.71	28.4	96.9	5.5	11.5	5.6	1.4	569.101
6.6	10.2		180.6	3.44	0.924	7.59	7.59	8.864	5.8	4.64	2.064	6.88	0.86	0.35	1.72	34.4	1.518	1.29	3	205.8	3.44	0.924	0	0.86	21.2	10.32	17.2	34.4	9.6	9.6	9.6	7.59	0.75	6	1.29	0.86	17.2	6.88	0.86	1.22	10.32	0.86	34.4	125.4	6.8	12.2	4.8	1.6	682.704
6.1	9.2		170.1	3.24	0.854	7.015	7.015	8.344	5.8	4.44	1.944	6.48	0.81	0.35	1.62	32.4	0	1.215	3	149.1	3.24	0.854	0	0.81	27.2	9.72	16.2	32.4	9.6	9.6	9.6	7.015	0.75	6	1.215	0.81	16.2	6.48	0.81	1.12	9.72	0.81	32.4	115.9	5.8	12.8	6.6	1.5	606.281
9	9.2		231	4.4	1.26	10.35	10.35	11.36	5.8	5.6	2.64	8.8	1.1	0.35	2.2	44	0	1.65	3	180.6	4.4	1.26	0	1.1	25.2	13.2	22	44	9.6	9.6	9.6	10.35	0.75	6	1.65	1.1	22	8.8	1.1	1.12	13.2	1.1	44	171	7.2	10.2	5.2	2.1	775.59
6.4	6.8		176.4	3.36	0.896	7.36	7.36	8.656	5.8	4.56	2.016	6.72	0.84	0.35	1.68	33.6	0	1.26	3	170.1	3.36	0.896	0	0.84	36.8	10.08	16.8	33.6	9.6	9.6	9.6	7.36	0.75	6	1.26	0.84	16.8	6.72	0.84	0.88	10.08	0.84	33.6	121.6	6.4	11.5	5.8	1.9	651.104
5.4	9.5		155.4	2.96	0.756	6.21	6.21	7.616	5.8	4.16	1.776	5.92	0.74	0.35	1.48	29.6	0	1.11	3	231	2.96	0.756	0	0.74	26.4	8.88	14.8	29.6	9.6	9.6	9.6	6.21	0.75	6	1.11	0.74	14.8	5.92	0.74	1.15	8.88	0.74	29.6	102.6	5.5	10.3	4.6	1.52	653.664
6.2	9.3		172.2	3.28	0.868	7.13	7.13	8.448	5.8	4.48	1.968	6.56	0.82	0.35	1.64	32.8	0	1.23	3	176.4	3.28	0.868	0	0.82	22.4	9.84	16.4	32.8	9.6	9.6	9.6	7.13	0.75	6	1.23	0.82	16.4	6.56	0.82	1.13	9.84	0.82	32.8	117.8	7.1	10.6	5	2	633.612
8.1	7.8		212.1	4.04	1.134	9.315	9.315	10.424	0	5.24	2.424	8.08	1.01	0.35	2.02	40.4	0	1.515	3	155.4	4.04	1.134	0	1.01	25.6	12.12	20.2	40.4	9.6	9.6	9.6	9.315	0.75	6	1.515	1.01	20.2	8.08	1.01	0.98	12.12	1.01	40.4	153.9	6.4	8.5	5.8	1.8	701.461
5.4	8.8		155.4	2.96	0.756	6.21	6.21	7.616	0	4.16	1.776	5.92	0.74	0.35	1.48	29.6	0	1.11	3	172.2	2.96	0.756	0	0.74	33.2	8.88	14.8	29.6	9.6	9.6	9.6	6.21	0.75	6	1.11	0.74	14.8	5.92	0.74	1.08	8.88	0.74	29.6	102.6	5.3	9	4.2	1.9	595.794
6.6	9.2		180.6	3.44	0.924	7.59	7.59	8.864	0	4.64	2.064	6.88	0.86	0.35	1.72	34.4	1.518	1.29	3	212.1	3.44	0.924	0	0.86	22.4	10.32	17.2	34.4	9.6	9.6	9.6	7.59	0.75	6	1.29	0.86	17.2	6.88	0.86	1.12	10.32	0.86	34.4	125.4	6.2	6.8	4.4	2	684.304
8.3	9.6		216.3	4.12	1.162	9.545	9.545	10.632	0	5.32	2.472	8.24	1.03	0.35	2.06	41.2	0	1.545	3	155.4	4.12	1.162	0	1.03	27.2	12.36	20.6	41.2	9.6	9.6	9.6	9.545	0.75	6	1.545	1.03	20.6	8.24	1.03	1.16	12.36	1.03	41.2	157.7	4.9	7.4	5.5	1.7	712.883
9	9.9		231	4.4	1.26	10.35	10.35	11.36	0	5.6	2.64	8.8	1.1	0.35	2.2	44	0	1.65	3	180.6	4.4	1.26	0	1.1	34	13.2	22	44	9.6	9.6	9.6	10.35	0.75	6	1.65	1.1	22	8.8	1.1	1.19	13.2	1.1	44	171	5.2	8.2	5.6	1.8	778.66
9.2	10.1		235.2	4.48	1.288	10.58	10.58	11.568	0	5.68	2.688	8.96	1.12	0.35	2.24	44.8	0	1.68	3	216.3	4.48	1.288	0	1.12	36.8	13.44	22.4	44.8	9.6	9.6	9.6	10.58	0.75	6	1.68	1.12	22.4	8.96	1.12	1.21	13.44	1.12	44.8	174.8	5.5	10.1	6.2	1.9	826.822
5	10.2		147	2.8	0.7	5.75	5.75	7.2	0	4	1.68	5.6	0.7	0.35	1.4	28	0	1.05	3	231	2.8	0.7	0	0.7	37.6	8.4	14	28	9.6	9.6	9.6	5.75	0.75	6	1.05	0.7	14	5.6	0.7	1.22	8.4	0.7	28	95	5.8	9.8	6.6	1.52	639.85
5.2	8.6		151.2	2.88	0.728	5.98	5.98	7.408	0	4.08	1.728	5.76	0.72	0.35	1.44	28.8	0	1.08	3	235.2	2.88	0.728	0	0.72	20.8	8.64	14.4	28.8	9.6	9.6	9.6	5.98	0.75	6	1.08	0.72	14.4	5.76	0.72	1.06	8.64	0.72	28.8	98.8	5.5	7.3	4.6	1.8	636.732
5.5	8.8		157.5	3	0.77	6.325	6.325	7.72	0	4.2	1.8	6	0.75	0.35	1.5	30	0	1.125	3	147	3	0.77	6.039	0.75	21.6	9	15	30	9.6	9.6	9.6	6.325	0.75	6	1.125	0.75	15	6	0.75	1.08	9	0.75	30	104.5	6.6	8.2	5.4	2.4	569.854
5.8	9.4		163.8	3.12	0.812	6.67	6.67	8.032	0	4.32	1.872	6.24	0.78	0.35	1.56	31.2	0	1.17	3	151.2	3.12	0.812	0	0.78	22.8	9.36	15.6	31.2	9.6	9.6	9.6	6.67	0.75	6	1.17	0.78	15.6	6.24	0.78	1.14	9.36	0.78	31.2	110.2	6.2	7.8	5.4	1.6	583.738
6.3	9.2		174.3	3.32	0.882	7.245	7.245	8.552	0	4.52	1.992	6.64	0.83	0.35	1.66	33.2	0	1.245	3	157.5	3.32	0.882	0	0.83	24	9.96	16.6	33.2	9.6	9.6	9.6	7.245	0.75	6	1.245	0.83	16.6	6.64	0.83	1.12	9.96	0.83	33.2	119.7	5.3	9	4.2	2.2	615.323
6.4	9.5		176.4	3.36	0.896	7.36	7.36	8.656	0	4.56	2.016	6.72	0.84	0.35	1.68	33.6	1.472	1.26	3	163.8	3.36	0.896	0	0.84	26	10.08	16.8	33.6	9.6	9.6	9.6	7.36	0.75	6	1.26	0.84	16.8	6.72	0.84	1.15	10.08	0.84	33.6	121.6	6.2	6.8	4.4	1.8	629.946
6.7	7.8		182.7	3.48	0.938	7.705	7.705	8.968	0	4.68	2.088	6.96	0.87	0.35	1.74	34.8	0	1.305	3	174.3	3.48	0.938	0	0.87	26.4	10.44	17.4	34.8	9.6	9.6	9.6	7.705	0.75	6	1.305	0.87	17.4	6.96	0.87	0.98	10.44	0.87	34.8	127.3	6.5	7.1	4.8	1.9	653.667
7	9.5		189	3.6	0.98	8.05	8.05	9.28	0	4.8	2.16	7.2	0.9	0.35	1.8	36	0	1.35	3	176.4	3.6	0.98	0	0.9	27.6	10.8	18	36	9.6	9.6	9.6	8.05	0.75	6	1.35	0.9	18	7.2	0.9	1.15	10.8	0.9	36	133	7.2	7.2	5.2	2	671.6
6.7	10.3		182.7	3.48	0.938	7.705	7.705	8.968	0	4.68	2.088	6.96	0.87	0.35	1.74	34.8	0	1.305	3	182.7	3.48	0.938	0	0.87	28.8	10.44	17.4	34.8	9.6	9.6	9.6	7.705	0.75	6	1.305	0.87	17.4	6.96	0.87	1.23	10.44	0.87	34.8	127.3	7.1	7.6	5	1.9	664.717
5.4	7.3		155.4	2.96	0.756	6.21	6.21	7.616	0	4.16	1.776	5.92	0.74	0.35	1.48	29.6	0	1.11	3	189	2.96	0.756	0	0.74	27.6	8.88	14.8	29.6	9.6	9.6	9.6	6.21	0.75	6	1.11	0.74	14.8	5.92	0.74	0.93	8.88	0.74	29.6	102.6	5.6	7.7	6.1	2.1	606.844
8.3	6.8		216.3	4.12	1.162	9.545	9.545	10.632	0	5.32	2.472	8.24	1.03	0.35	2.06	41.2	0	1.545	3	182.7	4.12	1.162	0	1.03	22.4	12.36	20.6	41.2	9.6	9.6	9.6	9.545	0.75	6	1.545	1.03	20.6	8.24	1.03	0.88	12.36	1.03	41.2	157.7	5.4	8.4	5.8	2.2	735.103
5	8.4		147	2.8	0.7	5.75	5.75	7.2	0	4	1.68	5.6	0.7	0.35	1.4	28	1.47	1.05	3	155.4	2.8	0.7	0	0.7	34	8.4	14	28	9.6	9.6	9.6	5.75	0.75	6	1.05	0.7	14	5.6	0.7	1.04	8.4	0.7	28	95	5.8	8.2	4.9	1.4	561.94
5.4	8.5		155.4	2.96	0.756	6.21	6.21	7.616	0	4.16	1.776	5.92	0.74	0.35	1.48	29.6	0	1.11	3	216.3	2.96	0.756	0	0.74	20.8	8.88	14.8	29.6	9.6	9.6	9.6	6.21	0.75	6	1.11	0.74	14.8	5.92	0.74	1.05	8.88	0.74	29.6	102.6	6.2	7.8	5.4	1.8	627.464
6	8.6		168	3.2	0.84	6.9	6.9	8.24	0	4.4	1.92	6.4	0.8	0.35	1.6	32	0	1.2	3	147	3.2	0.84	0	0.8	22.4	9.6	16	32	9.6	9.6	9.6	6.9	0.75	6	1.2	0.8	16	6.4	0.8	1.06	9.6	0.8	32	114	5.2	8.4	5.6	1.9	588.7
6.2	8.8		172.2	3.28	0.868	7.13	7.13	8.448	0	4.48	1.968	6.56	0.82	0.35	1.64	32.8	0	1.23	3	155.4	3.28	0.868	6.3756	0.82	24.8	9.84	16.4	32.8	9.6	9.6	9.6	7.13	0.75	6	1.23	0.82	16.4	6.56	0.82	1.08	9.84	0.82	32.8	117.8	7.4	8.5	6.2	2.4	615.538
5.1	9.2		149.1	2.84	0.714	5.865	5.865	7.304	0	4.04	1.704	5.68	0.71	0.35	1.42	28.4	0	1.065	3	168	2.84	0.714	0	0.71	25.6	8.52	14.2	28.4	9.6	9.6	9.6	5.865	0.75	6	1.065	0.71	14.2	5.68	0.71	1.12	8.52	0.71	28.4	96.9	7.2	7.2	5.2	1.8	569.571
6.4	9.3		176.4	3.36	0.896	7.36	7.36	8.656	0	4.56	2.016	6.72	0.84	0.35	1.68	33.6	0	1.26	3	172.2	3.36	0.896	0	0.84	21.2	10.08	16.8	33.6	9.6	9.6	9.6	7.36	0.75	6	1.26	0.84	16.8	6.72	0.84	1.13	10.08	0.84	33.6	121.6	6.2	8.3	5.4	1.7	632.054
6.3	9.5		174.3	3.32	0.882	7.245	7.245	8.552	0	4.52	1.992	6.64	0.83	0.35	1.66	33.2	0	1.245	3	149.1	3.32	0.882	0	0.83	26.4	9.96	16.6	33.2	9.6	9.6	9.6	7.245	0.75	6	1.245	0.83	16.6	6.64	0.83	1.15	9.96	0.83	33.2	119.7	6.6	8.4	4.7	1.8	609.353
6.4	9.6		176.4	3.36	0.896	7.36	7.36	8.656	0	4.56	2.016	6.72	0.84	0.35	1.68	33.6	0	1.26	3	176.4	3.36	0.896	0	0.84	26	10.08	16.8	33.6	9.6	9.6	9.6	7.36	0.75	6	1.26	0.84	16.8	6.72	0.84	1.16	10.08	0.84	33.6	121.6	6.8	9.2	4.8	1.9	641.084
6.2	10.2		172.2	3.28	0.868	7.13	7.13	8.448	0	4.48	1.968	6.56	0.82	0.35	1.64	32.8	0	1.23	3	174.3	3.28	0.868	0	0.82	26.4	9.84	16.4	32.8	9.6	9.6	9.6	7.13	0.75	6	1.23	0.82	16.4	6.56	0.82	1.22	9.84	0.82	32.8	117.8	5.4	8.4	5.8	1.9	629.802
7.2	10.3		193.2	3.68	1.008	8.28	8.28	9.488	0	4.88	2.208	7.36	0.92	0.35	1.84	36.8	0	1.38	3	176.4	3.68	1.008	0	0.92	25.6	11.04	18.4	36.8	9.6	9.6	9.6	8.28	0.75	6	1.38	0.92	18.4	7.36	0.92	1.23	11.04	0.92	36.8	136.8	5.5	8.5	5.6	2.1	679.322
6.8	7.8		184.8	3.52	0.952	7.82	7.82	9.072	0	4.72	2.112	7.04	0.88	0.35	1.76	35.2	0	1.32	3	172.2	3.52	0.952	0	0.88	29.6	10.56	17.6	35.2	9.6	9.6	9.6	7.82	0.75	6	1.32	0.88	17.6	7.04	0.88	0.98	10.56	0.88	35.2	129.2	5.5	7.3	4.6	2.2	659.588
7.8	6.8		205.8	3.92	1.092	8.97	8.97	10.112	0	5.12	2.352	7.84	0.98	0.35	1.96	39.2	0	1.47	3	193.2	3.92	1.092	0	0.98	28	11.76	19.6	39.2	9.6	9.6	9.6	8.97	0.75	6	1.47	0.98	19.6	7.84	0.98	0.88	11.76	0.98	39.2	148.2	5.8	8.2	4.9	1.8	727.098
9.2	8.4		235.2	4.48	1.288	10.58	10.58	11.568	0	5.68	2.688	8.96	1.12	0.35	2.24	44.8	0	1.68	3	184.8	4.48	1.288	0	1.12	32	13.44	22.4	44.8	9.6	9.6	9.6	10.58	0.75	6	1.68	1.12	22.4	8.96	1.12	1.04	13.44	1.12	44.8	174.8	4.9	7.4	5.5	2.2	790.352
5	9		147	2.8	0.7	5.75	5.75	7.2	0	4	1.68	5.6	0.7	0.35	1.4	28	0	1.05	3	205.8	2.8	0.7	0	0.7	37.6	8.4	14	28	9.6	9.6	9.6	5.75	0.75	6	1.05	0.7	14	5.6	0.7	1.1	8.4	0.7	28	95	5.2	8.2	5.6	1.8	614.53
5.4	9.2		155.4	2.96	0.756	6.21	6.21	7.616	0	4.16	1.776	5.92	0.74	0.35	1.48	29.6	0	1.11	3	235.2	2.96	0.756	0	0.74	20.8	8.88	14.8	29.6	9.6	9.6	9.6	6.21	0.75	6	1.11	0.74	14.8	5.92	0.74	1.12	8.88	0.74	29.6	102.6	5.5	10.1	6.2	1.9	646.434
10.2	9.1		256.2	4.88	1.428	11.73	11.73	12.608	0	6.08	2.928	9.76	1.22	0.35	2.44	48.8	0	1.83	3	147	4.88	1.428	0	1.22	22.4	14.64	24.4	48.8	9.6	9.6	9.6	11.73	0.75	6	1.83	1.22	24.4	9.76	1.22	1.11	14.64	1.22	48.8	193.8	6.6	8.4	4.7	1.5	791.232
4.5	9.2		136.5	2.6	0.63	5.175	5.175	6.68	0	3.8	1.56	5.2	0.65	0.35	1.3	26	0	0.975	3	155.4	2.6	0.63	0	0.65	41.6	7.8	13	26	9.6	9.6	9.6	5.175	0.75	6	0.975	0.65	13	5.2	0.65	1.12	7.8	0.65	26	85.5	6.8	9.2	4.8	1.7	544.045
4.8	9.3		142.8	2.72	0.672	5.52	5.52	6.992	0	3.92	1.632	5.44	0.68	0.35	1.36	27.2	1.104	1.02	3	256.2	2.72	0.672	0	0.68	18.8	8.16	13.6	27.2	9.6	9.6	9.6	5.52	0.75	6	1.02	0.68	13.6	5.44	0.68	1.13	8.16	0.68	27.2	91.2	7.1	7.6	5	1.8	637.622
5.1	9.5		149.1	2.84	0.714	5.865	5.865	7.304	0	4.04	1.704	5.68	0.71	0.35	1.42	28.4	0	1.065	3	136.5	2.84	0.714	0	0.71	20	8.52	14.2	28.4	9.6	9.6	9.6	5.865	0.75	6	1.065	0.71	14.2	5.68	0.71	1.15	8.52	0.71	28.4	96.9	5.6	7.7	6.1	1.9	532.501
6.7	8.2		182.7	3.48	0.938	7.705	7.705	8.968	0	4.68	2.088	6.96	0.87	0.35	1.74	34.8	0	1.305	3	142.8	3.48	0.938	0	0.87	21.2	10.44	17.4	34.8	9.6	9.6	9.6	7.705	0.75	6	1.305	0.87	17.4	6.96	0.87	1.02	10.44	0.87	34.8	127.3	5.3	9	4.2	1.4	617.007
7	8.3		189	3.6	0.98	8.05	8.05	9.28	0	4.8	2.16	7.2	0.9	0.35	1.8	36	0	1.35	3	149.1	3.6	0.98	0	0.9	27.6	10.8	18	36	9.6	9.6	9.6	8.05	0.75	6	1.35	0.9	18	7.2	0.9	1.03	10.8	0.9	36	133	6.2	6.8	4.4	1.8	644.18
6.2	8.4		172.2	3.28	0.868	7.13	7.13	8.448	0	4.48	1.968	6.56	0.82	0.35	1.64	32.8	0	1.23	3	182.7	3.28	0.868	0	0.82	28.8	9.84	16.4	32.8	9.6	9.6	9.6	7.13	0.75	6	1.23	0.82	16.4	6.56	0.82	1.04	9.84	0.82	32.8	117.8	6.5	7.1	4.8	1.9	640.422
7.8	8.8		205.8	3.92	1.092	8.97	8.97	10.112	0	5.12	2.352	7.84	0.98	0.35	1.96	39.2	0	1.47	3	189	3.92	1.092	0	0.98	25.6	11.76	19.6	39.2	9.6	9.6	9.6	8.97	0.75	6	1.47	0.98	19.6	7.84	0.98	1.08	11.76	0.98	39.2	148.2	5.2	8.2	5.6	2.1	720.698
8.1	9.4		212.1	4.04	1.134	9.315	9.315	10.424	0	5.24	2.424	8.08	1.01	0.35	2.02	40.4	0	1.515	3	172.2	4.04	1.134	0	1.01	32	12.12	20.2	40.4	9.6	9.6	9.6	9.315	0.75	6	1.515	1.01	20.2	8.08	1.01	1.14	12.12	1.01	40.4	153.9	5.5	10.1	6.2	2.2	724.821
5.4	8.4		155.4	2.96	0.756	6.21	6.21	7.616	0	4.16	1.776	5.92	0.74	0.35	1.48	29.6	0	1.11	3	205.8	2.96	0.756	0	0.74	33.2	8.88	14.8	29.6	9.6	9.6	9.6	6.21	0.75	6	1.11	0.74	14.8	5.92	0.74	1.04	8.88	0.74	29.6	102.6	5.8	9.8	6.6	1.8	629.354
6.6	9		180.6	3.44	0.924	7.59	7.59	8.864	0	4.64	2.064	6.88	0.86	0.35	1.72	34.4	0	1.29	3	212.1	3.44	0.924	0	0.86	22.4	10.32	17.2	34.4	9.6	9.6	9.6	7.59	0.75	6	1.29	0.86	17.2	6.88	0.86	1.1	10.32	0.86	34.4	125.4	6.2	8.3	5.4	1.9	682.766
6	9.6		168	3.2	0.84	6.9	6.9	8.24	0	4.4	1.92	6.4	0.8	0.35	1.6	32	0	1.2	3	155.4	3.2	0.84	0	0.8	27.2	9.6	16	32	9.6	9.6	9.6	6.9	0.75	6	1.2	0.8	16	6.4	0.8	1.16	9.6	0.8	32	114	5.8	8.2	4.9	1.6	602
6.2	9.9		172.2	3.28	0.868	7.13	7.13	8.448	0	4.48	1.968	6.56	0.82	0.35	1.64	32.8	0	1.23	3	180.6	3.28	0.868	0	0.82	24.8	9.84	16.4	32.8	9.6	9.6	9.6	7.13	0.75	6	1.23	0.82	16.4	6.56	0.82	1.19	9.84	0.82	32.8	117.8	6.2	7.8	5.4	1.9	634.472
10.2	10.1		256.2	4.88	1.428	11.73	11.73	12.608	0	6.08	2.928	9.76	1.22	0.35	2.44	48.8	0	1.83	3	168	4.88	1.428	0	1.22	25.6	14.64	24.4	48.8	9.6	9.6	9.6	11.73	0.75	6	1.83	1.22	24.4	9.76	1.22	1.21	14.64	1.22	48.8	193.8	5.2	8.4	5.6	2.1	815.532
5.1	7		149.1	2.84	0.714	5.865	5.865	7.304	0	4.04	1.704	5.68	0.71	0.35	1.42	28.4	0	1.065	3	172.2	2.84	0.714	0	0.71	41.6	8.52	14.2	28.4	9.6	9.6	9.6	5.865	0.75	6	1.065	0.71	14.2	5.68	0.71	0.9	8.52	0.71	28.4	96.9	6.2	6.8	4.4	1.9	589.551
5.2	6.8		151.2	2.88	0.728	5.98	5.98	7.408	0	4.08	1.728	5.76	0.72	0.35	1.44	28.8	0	1.08	3	256.2	2.88	0.728	0	0.72	21.2	8.64	14.4	28.8	9.6	9.6	9.6	5.98	0.75	6	1.08	0.72	14.4	5.76	0.72	0.88	8.64	0.72	28.8	98.8	6.5	7.1	4.8	1.4	657.952
5.5	8.2		157.5	3	0.77	6.325	6.325	7.72	0	4.2	1.8	6	0.75	0.35	1.5	30	0	1.125	3	149.1	3	0.77	0	0.75	21.6	9	15	30	9.6	9.6	9.6	6.325	0.75	6	1.125	0.75	15	6	0.75	1.02	9	0.75	30	104.5	7.2	7.2	5.2	1.8	565.855
5.8	8.3		163.8	3.12	0.812	6.67	6.67	8.032	0	4.32	1.872	6.24	0.78	0.35	1.56	31.2	0	1.17	3	151.2	3.12	0.812	0	0.78	22.8	9.36	15.6	31.2	9.6	9.6	9.6	6.67	0.75	6	1.17	0.78	15.6	6.24	0.78	1.03	9.36	0.78	31.2	110.2	4.9	7.4	5.5	1.9	583.628
7.2	9.2		193.2	3.68	1.008	8.28	8.28	9.488	0	4.88	2.208	7.36	0.92	0.35	1.84	36.8	0	1.38	3	157.5	3.68	1.008	0	0.92	24	11.04	18.4	36.8	9.6	9.6	9.6	8.28	0.75	6	1.38	0.92	18.4	7.36	0.92	1.12	11.04	0.92	36.8	136.8	5.6	7.7	6.1	2.1	658.712
6.8	9.5		184.8	3.52	0.952	7.82	7.82	9.072	0	4.72	2.112	7.04	0.88	0.35	1.76	35.2	0	1.32	3	163.8	3.52	0.952	0	0.88	29.6	10.56	17.6	35.2	9.6	9.6	9.6	7.82	0.75	6	1.32	0.88	17.6	7.04	0.88	1.15	10.56	0.88	35.2	129.2	5.4	8.4	5.8	1.5	651.358
7.8	7.8		205.8	3.92	1.092	8.97	8.97	10.112	0	5.12	2.352	7.84	0.98	0.35	1.96	39.2	0	1.47	3	193.2	3.92	1.092	0	0.98	28	11.76	19.6	39.2	9.6	9.6	9.6	8.97	0.75	6	1.47	0.98	19.6	7.84	0.98	0.98	11.76	0.98	39.2	148.2	5.5	8.5	5.6	1.7	727.198
6.6	9.3		180.6	3.44	0.924	7.59	7.59	8.864	0	4.64	2.064	6.88	0.86	0.35	1.72	34.4	0	1.29	3	184.8	3.44	0.924	0	0.86	32	10.32	17.2	34.4	9.6	9.6	9.6	7.59	0.75	6	1.29	0.86	17.2	6.88	0.86	1.13	10.32	0.86	34.4	125.4	6.2	7.8	5.4	1.52	665.096
6.7	9.5		182.7	3.48	0.938	7.705	7.705	8.968	0	4.68	2.088	6.96	0.87	0.35	1.74	34.8	0	1.305	3	205.8	3.48	0.938	0	0.87	27.2	10.44	17.4	34.8	9.6	9.6	9.6	7.705	0.75	6	1.305	0.87	17.4	6.96	0.87	1.15	10.44	0.87	34.8	127.3	5.2	8.4	5.6	1.6	686.137
5.4	9.6		155.4	2.96	0.756	6.21	6.21	7.616	0	4.16	1.776	5.92	0.74	0.35	1.48	29.6	0	1.11	3	180.6	2.96	0.756	0	0.74	27.6	8.88	14.8	29.6	9.6	9.6	9.6	6.21	0.75	6	1.11	0.74	14.8	5.92	0.74	1.16	8.88	0.74	29.6	102.6	6.4	8.5	5.8	1.9	598.674
8.3	9.9		216.3	4.12	1.162	9.545	9.545	10.632	0	5.32	2.472	8.24	1.03	0.35	2.06	41.2	0	1.545	3	182.7	4.12	1.162	0	1.03	22.4	12.36	20.6	41.2	9.6	9.6	9.6	9.545	0.75	6	1.545	1.03	20.6	8.24	1.03	1.19	12.36	1.03	41.2	157.7	5.3	9	4.2	2.1	735.413
5.4	7.4		155.4	2.96	0.756	6.21	6.21	7.616	0	4.16	1.776	5.92	0.74	0.35	1.48	29.6	0	1.11	3	155.4	2.96	0.756	0	0.74	34	8.88	14.8	29.6	9.6	9.6	9.6	6.21	0.75	6	1.11	0.74	14.8	5.92	0.74	0.94	8.88	0.74	29.6	102.6	4.9	7.4	5.5	1.4	579.654
6	6.8		168	3.2	0.84	6.9	6.9	8.24	0	4.4	1.92	6.4	0.8	0.35	1.6	32	1.38	1.2	3	216.3	3.2	0.84	0	0.8	22.4	9.6	16	32	9.6	9.6	9.6	6.9	0.75	6	1.2	0.8	16	6.4	0.8	0.88	9.6	0.8	32	114	5.2	8.2	5.6	1.8	659.2
6.2	8.2		172.2	3.28	0.868	7.13	7.13	8.448	0	4.48	1.968	6.56	0.82	0.35	1.64	32.8	0	1.23	3	155.4	3.28	0.868	0	0.82	24.8	9.84	16.4	32.8	9.6	9.6	9.6	7.13	0.75	6	1.23	0.82	16.4	6.56	0.82	1.02	9.84	0.82	32.8	117.8	5.5	10.1	6.2	1.9	609.102
10.2	8.3		256.2	4.88	1.428	11.73	11.73	12.608	0	6.08	2.928	9.76	1.22	0.35	2.44	48.8	0	1.83	3	168	4.88	1.428	0	1.22	25.6	14.64	24.4	48.8	9.6	9.6	9.6	11.73	0.75	6	1.83	1.22	24.4	9.76	1.22	1.03	14.64	1.22	48.8	193.8	5.8	9.8	6.6	1.6	815.352
4.8	8.5		142.8	2.72	0.672	5.52	5.52	6.992	0	3.92	1.632	5.44	0.68	0.35	1.36	27.2	0	1.02	3	172.2	2.72	0.672	0	0.68	41.6	8.16	13.6	27.2	9.6	9.6	9.6	5.52	0.75	6	1.02	0.68	13.6	5.44	0.68	1.05	8.16	0.68	27.2	91.2	6.6	8.4	4.7	2.1	575.238
5.2	8.8		151.2	2.88	0.728	5.98	5.98	7.408	0	4.08	1.728	5.76	0.72	0.35	1.44	28.8	0	1.08	3	256.2	2.88	0.728	0	0.72	20	8.64	14.4	28.8	9.6	9.6	9.6	5.98	0.75	6	1.08	0.72	14.4	5.76	0.72	1.08	8.64	0.72	28.8	98.8	7.1	7.6	5	1.8	656.952
5.5	9.2		157.5	3	0.77	6.325	6.325	7.72	0	4.2	1.8	6	0.75	0.35	1.5	30	0	1.125	3	142.8	3	0.77	0	0.75	21.6	9	15	30	9.6	9.6	9.6	6.325	0.75	6	1.125	0.75	15	6	0.75	1.12	9	0.75	30	104.5	5.6	7.7	6.1	1.9	559.655
5.8	8.4		163.8	3.12	0.812	6.67	6.67	8.032	0	4.32	1.872	6.24	0.78	0.35	1.56	31.2	0	1.17	3	151.2	3.12	0.812	0	0.78	22.8	9.36	15.6	31.2	9.6	9.6	9.6	6.67	0.75	6	1.17	0.78	15.6	6.24	0.78	1.04	9.36	0.78	31.2	110.2	5.4	8.4	5.8	2	583.638
6.1	8.2		170.1	3.24	0.854	7.015	7.015	8.344	0	4.44	1.944	6.48	0.81	0.35	1.62	32.4	0	1.215	3	157.5	3.24	0.854	0	0.81	24	9.72	16.2	32.4	9.6	9.6	9.6	7.015	0.75	6	1.215	0.81	16.2	6.48	0.81	1.02	9.72	0.81	32.4	115.9	5.5	8.5	5.6	2.1	605.581
6.4	8.8		176.4	3.36	0.896	7.36	7.36	8.656	0	4.56	2.016	6.72	0.84	0.35	1.68	33.6	0	1.26	3	163.8	3.36	0.896	0	0.84	25.2	10.08	16.8	33.6	9.6	9.6	9.6	7.36	0.75	6	1.26	0.84	16.8	6.72	0.84	1.08	10.08	0.84	33.6	121.6	6.4	6.8	4.9	1.5	627.604
6.3	9.4		174.3	3.32	0.882	7.245	7.245	8.552	0	4.52	1.992	6.64	0.83	0.35	1.66	33.2	0	1.245	3	170.1	3.32	0.882	0	0.83	26.4	9.96	16.6	33.2	9.6	9.6	9.6	7.245	0.75	6	1.245	0.83	16.6	6.64	0.83	1.14	9.96	0.83	33.2	119.7	5.8	7.1	5.5	1.7	630.343
6.4	9.5		176.4	3.36	0.896	7.36	7.36	8.656	0	4.56	2.016	6.72	0.84	0.35	1.68	33.6	0	1.26	3	176.4	3.36	0.896	0	0.84	26	10.08	16.8	33.6	9.6	9.6	9.6	7.36	0.75	6	1.26	0.84	16.8	6.72	0.84	1.15	10.08	0.84	33.6	121.6	5.4	7.8	4.4	1.8	641.074
7	10.2		189	3.6	0.98	8.05	8.05	9.28	0	4.8	2.16	7.2	0.9	0.35	1.8	36	0	1.35	3	174.3	3.6	0.98	0	0.9	26.4	10.8	18	36	9.6	9.6	9.6	8.05	0.75	6	1.35	0.9	18	7.2	0.9	1.22	10.8	0.9	36	133	5.2	8.2	4.3	1.52	668.37
7.4	10.1		197.4	3.76	1.036	8.51	8.51	9.696	0	4.96	2.256	7.52	0.94	0.35	1.88	37.6	0	1.41	3	176.4	3.76	1.036	0	0.94	28.8	11.28	18.8	37.6	9.6	9.6	9.6	8.51	0.75	6	1.41	0.94	18.8	7.52	0.94	1.21	11.28	0.94	37.6	140.6	5.9	7.6	4.4	1.6	692.144
6.3	10.9		174.3	3.32	0.882	7.245	7.245	8.552	0	4.52	1.992	6.64	0.83	0.35	1.66	33.2	0	1.245	3	189	3.32	0.882	0	0.83	30.4	9.96	16.6	33.2	9.6	9.6	9.6	7.245	0.75	6	1.245	0.83	16.6	6.64	0.83	1.29	9.96	0.83	33.2	119.7	5.4	7.3	4.7	1.9	653.393
																																														9.71837	5.29524	1.8615	644.568
																																														10.1	5.4	1.9	655.459
																																														1.78016	0.621205	0.239797	66.1682
																																														1438.32	783.695	275.501	96997
																																														1160.72	632.442	222.33
[truncated: 13 more columns]
